# Supplementary material
Source: PubMed Central journal article supplement (PMC7940577)
Supplement: NIHMS1661594-supplement-TABLE_S1.pdf [file NIHMS1661594-supplement-TABLE_S1.pdf]

Supplementary Table S1

|                                            | Sequences                                                                                                                                                      |
|--------------------------------------------|----------------------------------------------------------------------------------------------------------------------------------------------------------------|
| <b>Oligo nucleotides for HiBiT tagging</b> |                                                                                                                                                                |
| crRNA                                      | GAGGAGACGTAATCCAGCAT                                                                                                                                           |
| ssDNA oligo                                | CACTTCCCATGAAATTAATATACTATTATCACTCTCCAGATACACATTTGGAGG<br>AGACGGTGAGCGGCTGGCGGCTGTTCAAGAAGATTAGCTAATCCAGCATTGG<br>AACTTCTGATCTTCAAGCAGGGATTCTCAACCTGTGGTTTAGGG |
| Sequencing Primer                          | GCCCCGATGAACCCCTAAAC                                                                                                                                           |
| siRNA for PDL1                             |                                                                                                                                                                |
| siPDL1-1                                   | GCGAATTACTGTGAAAGTCAA                                                                                                                                          |
| siPDL1-2                                   | CACGGTCCCAAGGACCTATA                                                                                                                                           |
| siPDL1-3                                   | CGGGACAGTATTTATGTATGA                                                                                                                                          |
| siPDL1-4                                   | CACTGAGAATCAACACAACAA                                                                                                                                          |
| qPCR primers                               |                                                                                                                                                                |
| CD274 Fw                                   | AGACCACCACCACCAATTCC                                                                                                                                           |
| CD274 Rv                                   | TGGAGGATGTGCCAGAGGTA                                                                                                                                           |
| PSMB2 Fw                                   | TTCCCTCTGAGGTGCTGTCT                                                                                                                                           |
| PSMB2 Rv                                   | ACATCTTGTCATGATCGTCCTTCA                                                                                                                                       |
