# Supplementary material
Source: PubMed Central journal article supplement (PMC7940577)
Supplement: NIHMS1661594-supplement-TABLE_S2.pdf [file NIHMS1661594-supplement-TABLE_S2.pdf]

Supplementary Table S2  
Results of Chemical compounds screening

| Name                                               | Class                            | Action            | Selectivity                            | Ratio(DMSO) |
|----------------------------------------------------|----------------------------------|-------------------|----------------------------------------|-------------|
| Emetine dihydrochloride hydrate                    | Apoptosis                        | Activator         |                                        | 2.260       |
| Vincristine sulfate                                | Cytoskeleton and ECM             | Inhibitor         | Tubulin                                | 2.212       |
| Podophyllotoxin                                    | Cytoskeleton and ECM             | Inhibitor         | Tubulin                                | 2.180       |
| Vinblastine sulfate salt                           | Cytoskeleton and ECM             | Inhibitor         | Tubulin                                | 2.057       |
| Colchicine                                         | Cytoskeleton and ECM             | Inhibitor         | Tubulin                                | 1.809       |
| Thiocolchicine                                     | Apoptosis                        | Inducer           |                                        | 1.708       |
| Thapsigargin                                       | Intracellular Calcium            | Releaser          |                                        | 1.609       |
| Phorbol 12-myristate 13-acetate                    | Phosphorylation                  | Activator         | PKC                                    | 1.509       |
| Gemcitabine hydrochloride                          | Apoptosis and Cell Cycle         |                   |                                        | 1.494       |
| Quabain                                            | Ion Pump                         | Inhibitor         | Na+/K+ ATPase                          | 1.382       |
| RepSox                                             | Neuroscience                     | Inhibitor         |                                        | 1.287       |
| SB743921 hydrochloride                             | Cell Cycle                       | Inhibitor         | KSP                                    | 1.283       |
| Brequinar sodium salt hydrate                      | DNA-RNA transcription regulators | Inhibitor         | DHODH                                  | 1.272       |
| Diphenylethidium chloride                          | Nitric Oxide                     | Inhibitor         | eNOS                                   | 1.248       |
| CID 11210285 hydrochloride                         | Gene Regulation                  | Agonist           | Wnt                                    | 1.218       |
| Idarubicin                                         | DNA Metabolism                   | Inhibitor         |                                        | 1.213       |
| Rotenone                                           | Cell Stress                      | Modulator         | Mitochondria                           | 1.211       |
| (-)-Epinephrine bitartrate                         | Adrenoceptor                     | Agonist           |                                        | 1.195       |
| BMS-195614                                         | Gene regulation                  | Antagonist        | RARa                                   | 1.193       |
| Oltipraz metabolite M2                             | Lipid Signaling                  | Inhibitor         | LXRa                                   | 1.164       |
| SU 5416                                            | Phosphorylation                  | Inhibitor         | VEGFR PTK                              | 1.156       |
| KRN633                                             | Kinase                           | Inhibitor         | VEGFR                                  | 1.153       |
| Sodium Taurocholate hydrate                        | Multi-Drug Resistance            | Modulator         | Conjugate Pathway                      | 1.150       |
| YM 976                                             | Cyclic nucleotides               | Inhibitor         | PDE 4                                  | 1.145       |
| Calcimycin                                         | Intracellular Calcium            |                   | Ca2+                                   | 1.145       |
| DL-2-Amino-5-phosphopentanoic acid                 | Glutamate                        | Antagonist        | NMDA                                   | 1.144       |
| Ethopropazine hydrochloride                        | Neurotransmission                | Inhibitor         | Butyrylcholinesterase                  | 1.140       |
| Cefazolin sodium                                   | Antibiotic                       |                   | Cell wall synthesis                    | 1.136       |
| IC 261                                             | Phosphorylation                  | Inhibitor         | CK-1delta/epsilon                      | 1.134       |
| Nylidrin hydrochloride                             | Adrenoceptor                     | Agonist           | beta                                   | 1.133       |
| GR 113808                                          | Serotonin                        | Antagonist        | 5-HT4                                  | 1.132       |
| Pifithrin-mu                                       | Apoptosis                        | Inhibitor         | p53 binding                            | 1.122       |
| EGTA                                               | Biochemistry                     | Inhibitor         | Carboxypeptidase B                     | 1.122       |
| DMH4                                               | Kinase/Phosphatase               | Inhibitor         | VEGF                                   | 1.118       |
| L(-)-Norepinephrine bitartrate                     | Adrenoceptor                     | Agonist           | alpha, beta1                           | 1.118       |
| SU 1498                                            | Tyrosine Kinase                  | Inhibitor         |                                        | 1.114       |
| Phenylephrine hydrochloride                        | Adrenoceptor                     | Agonist           | alpha1                                 | 1.113       |
| Epibestatin hydrochloride                          | Biochemistry                     | Inhibitor         | Metalloprotease                        | 1.113       |
| BAY 61-3606 hydrochloride hydrate                  | Phosphorylation                  | Inhibitor         | Tyrosine kinase                        | 1.111       |
| Capsazepine                                        | Vanilloid                        | Agonist           |                                        | 1.108       |
| Ro 41-0960                                         | Neurotransmission                | Inhibitor         | COMT                                   | 1.105       |
| Piribedil maleate                                  | Dopamine                         | Agonist           | D3                                     | 1.102       |
| SIB 1757                                           | Glutamate                        | Antagonist        | mGluR5                                 | 1.102       |
| Albuterol hemisulfate                              | Adrenoceptor                     | Agonist           | beta2                                  | 1.101       |
| erythro-9-(2-Hydroxy-3-nonyl)adenine hydrochloride | Adenosine                        | Inhibitor         | Adenosine deaminase                    | 1.101       |
| CYM50769                                           | Cytokines                        | Antagonist        | NPBWR1                                 | 1.101       |
| CNQX disodium                                      | Glutamate                        | Antagonist        | AMPA/Kainate                           | 1.099       |
| Nocodazole                                         | Cytoskeleton and ECM             | Inhibitor         | beta-tubulin                           | 1.099       |
| Carmofur                                           | Apoptosis                        |                   |                                        | 1.098       |
| (-)-alpha-Methylnorepinephrine                     | Adrenoceptor                     | Agonist           |                                        | 1.095       |
| (+/-)-Anisodamine                                  | Cholinergic                      | Antagonist        | muscarinic                             | 1.094       |
| 5-(N,N-Dimethyl)amiloride hydrochloride            | Ion Pump                         | Blocker           | Na+/H+ Antiporter                      | 1.093       |
| Spiperone hydrochloride                            | Dopamine                         | Antagonist        | D2                                     | 1.090       |
| Epinephrine hydrochloride                          | Adrenoceptor                     | Agonist           |                                        | 1.090       |
| BMS-299897                                         | Cell Biology                     | Inhibitor         | alpha-secretase                        | 1.088       |
| K145 hydrochloride                                 | Kinase Phosphatase               | Inhibitor         | SphK2                                  | 1.087       |
| L2-b                                               | Cell Biology                     | Chelator          |                                        | 1.087       |
| Tetraethylthiuram disulfide                        | Biochemistry                     | Inhibitor         | Alcohol Dehydrogenase                  | 1.086       |
| SCH-50911                                          | GABAergics                       | Antagonist        | GABA <sub>B</sub>                      | 1.086       |
| 4-Imidazoleacrylic acid                            | Histamine                        | Inhibitor         | Histidine ammonia-lyase/ decarboxylase | 1.085       |
| Spermidine trihydrochloride                        | Glutamate                        | Ligand            | NMDA-Polyamine                         | 1.083       |
| Auranofin                                          | Phosphorylation                  | Inhibitor         |                                        | 1.083       |
| BPTES                                              | Oxidative Stress                 | Inhibitor         | GLS1                                   | 1.083       |
| Prilocaine hydrochloride                           | Na+ Channel                      | Blocker           |                                        | 1.082       |
| Mevastatin                                         | Antibiotic                       | Inhibitor         | Ras, Rho                               | 1.081       |
| LP44                                               | Serotonin                        | Agonist           | 5-HT7                                  | 1.080       |
| Trifluoperidol hydrochloride                       | Dopamine                         | Antagonist        | D1/D2                                  | 1.079       |
| SCH-202676 hydrobromide                            | G protein                        | Modulator         | GPCR                                   | 1.079       |
| p-Chlorophenylalanine                              | Neurotransmission                | Inhibitor         | Tryptophan hydroxylase                 | 1.077       |
| Domperidone                                        | Dopamine                         | Antagonist        | D2                                     | 1.077       |
| (6R)-5,6,7,8-Tetrahydro-L-biopterin hydrochloride  | Neurotransmission                | Cofactor          | Tyrosine & tryptophan hydroxylase, NOS | 1.076       |
| SB-525334                                          | Phosphorylation                  | Inhibitor         | Aik5                                   | 1.076       |
| cis(+/-)-8-OH-PBZI hydrobromide                    | Dopamine                         | Agonist           | D3                                     | 1.075       |
| Bupropion hydrochloride                            | Dopamine                         | Blocker           | Reuptake                               | 1.075       |
| TBBz                                               | Phosphorylation                  | Inhibitor         | CK2                                    | 1.072       |
| Tyrphostin 51                                      | Phosphorylation                  | Inhibitor         | EGFR                                   | 1.071       |
| cis-Piperidine-2,3-dicarboxylic acid               | Glutamate                        | Agonist           | NMDA                                   | 1.069       |
| 3'-Azido-3'-deoxythymidine                         | Immune System                    | Inhibitor         | Reverse transcriptase                  | 1.069       |
| Daurisoline                                        | Ion Channels                     | Modulator         |                                        | 1.069       |
| Terutroban                                         | Cell Signaling and Neuroscience  | Inhibitor         | TPr                                    | 1.068       |
| CCT137690                                          | Kinase/Phosphatase Biology       | Inhibitor         | Aurora A, B and C                      | 1.068       |
| S-Methylisothiourea hemisulfate                    | Nitric Oxide                     | Inhibitor         | iNOS                                   | 1.068       |
| BMS-193885                                         | Neurotransmission                | Antagonist        | Y1                                     | 1.067       |
| Stattic                                            | Gene Regulation                  | Inhibitor         | STAT3                                  | 1.067       |
| L-Mimosine from Koa hoale seeds                    | Apoptosis                        | Inhibitor         |                                        | 1.067       |
| Procainamide hydrochloride                         | Na+ Channel                      | Antagonist        |                                        | 1.066       |
| GR 79236X                                          | Adenosine                        | Agonist           | A1                                     | 1.066       |
| Octoclotheptin maleate                             | Dopamine                         | Antagonist        | D2                                     | 1.065       |
| (-)-Sulpiride                                      | Dopamine                         | Antagonist        | D2                                     | 1.065       |
| Propionylpromazine hydrochloride                   | Dopamine                         | Antagonist        | D2                                     | 1.065       |
| Isotharine mesylate                                | Adrenoceptor                     | Agonist           | beta                                   | 1.064       |
| Genistein                                          | Phosphorylation                  | Inhibitor         | Tyrosine kinase                        | 1.064       |
| Nisoxetine hydrochloride                           | Adrenoceptor                     | Blocker           | Reuptake                               | 1.064       |
| 4-Hydroxyphenethylamine hydrochloride              | Dopamine                         | Agonist           |                                        | 1.064       |
| NSC405020                                          | Extracellular Matrix             | Inhibitor         | MT1-MMP                                | 1.063       |
| Alaproclate hydrochloride                          | Serotonin                        | Inhibitor         | Reuptake                               | 1.063       |
| Procaine hydrochloride                             | Na+ Channel                      | Blocker           |                                        | 1.062       |
| Cystamine dihydrochloride                          | Glutamate                        | Inhibitor         | Transglutaminase                       | 1.062       |
| (+)-Chlorpheniramine maleate                       | Histamine                        | Antagonist        | H1                                     | 1.062       |
| CP466722                                           | Kinase/Phosphatase               | Inhibitor         | ATM                                    | 1.062       |
| Lubiprostone                                       | Ion Channels                     | Channel Activator | CIC-2 and CFTR                         | 1.061       |
| Terfenadine                                        | Histamine                        | Antagonist        | H1                                     | 1.061       |
| Succinylcholine chloride                           | Cholinergic                      | Antagonist        | Nicotinic                              | 1.060       |
| 3-Tropanyl-indole-3-carboxylate hydrochloride      | Serotonin                        | Antagonist        | 5-HT3                                  | 1.060       |
| 2-Chloroadenosine                                  | Adenosine                        | Agonist           | A1 > A2                                | 1.059       |
| N6-Cyclopentyladenosine                            | Adenosine                        | Agonist           | A1                                     | 1.059       |
| Ribavirin                                          | Cell Cycle                       | Inhibitor         | IMP dehydrogenase                      | 1.059       |
| UK 14,304                                          | Adrenoceptor                     | Agonist           | alpha2                                 | 1.058       |
| R(-)-Isoproterenol (+)-bitartrate                  | Adrenoceptor                     | Agonist           | beta                                   | 1.058       |
| Sulpiride                                          | Dopamine                         | Antagonist        | D2                                     | 1.058       |
| Flumazenil                                         | Benzodiazepine                   | Antagonist        |                                        | 1.058       |
| 6(SH)-Phenanthridinone                             | Transcription                    | Inhibitor         | PARP                                   | 1.058       |
| AC-55649                                           | Gene Regulation                  | Agonist           | RARbeta2                               | 1.057       |
| SDZ 220-581 hydrochloride                          | Neurotransmission                | Antagonist        | NMDA                                   | 1.057       |

|                                                                  |                          |                    |                                             |       |
|------------------------------------------------------------------|--------------------------|--------------------|---------------------------------------------|-------|
| Trimipramine maleate                                             | Serotonin                | Inhibitor          | Reuptake                                    | 1.056 |
| NS593 hydrochloride                                              | Ca2+ Channel             | Blocker            | SK(Ca)                                      | 1.056 |
| Promazine hydrochloride                                          | Dopamine                 | Antagonist         | D2                                          | 1.056 |
| Clofibrate                                                       | Lipid                    | Modulator          | Lipoprotein lipase                          | 1.056 |
| 3,7-Dimethyl-1-propargylxanthine                                 | Adenosine                | Antagonist         | A2                                          | 1.056 |
| Quipazine, 6-nitro-, maleate                                     | Serotonin                | Inhibitor          | Reuptake                                    | 1.056 |
| TMPH hydrochloride                                               | Cholinergic              | Inhibitor          | Nicotinic                                   | 1.055 |
| NBQX disodium                                                    | Glutamate                | Antagonist         | AMPA/kainate                                | 1.055 |
| LDN-21417                                                        | Tyrosine kinase          | Inhibitor          | BMP                                         | 1.055 |
| Chlorothiazide                                                   | Biochemistry             | Inhibitor          | Carbonic anhydrase                          | 1.054 |
| L-703,606 oxalate salt hydrate                                   | Tachykinin               | Antagonist         | NK1                                         | 1.054 |
| GANT61                                                           | Angiogenic Factors       | Inhibitor          | SF-1                                        | 1.054 |
| Rutaecarpine                                                     | K+ Channel               | Blocker            |                                             | 1.053 |
| Bropiramine                                                      | Immunomodulators         |                    |                                             | 1.053 |
| Pergolide methanesulfonate                                       | Dopamine                 | Agonist            | D2/D1                                       | 1.053 |
| Pancuronium bromide                                              | Cholinergic              | Antagonist         |                                             | 1.053 |
| Pirenperone                                                      | Serotonin                | Antagonist         | 5-HT2                                       | 1.053 |
| S(-)-Eticlopride hydrochloride                                   | Dopamine                 | Antagonist         | D2                                          | 1.053 |
| TPMPA                                                            | GABA                     | Antagonist         | GABA-C                                      | 1.052 |
| D(-)-2-Amino-5-phosphonopentanoic acid                           | Glutamate                | Antagonist         | NMDA-glycine                                | 1.052 |
| Pyrimilamine maleate                                             | Histamine                | Antagonist         | H1                                          | 1.051 |
| 4-DAMP                                                           | Cholinergics             | Antagonist         | M3                                          | 1.051 |
| Taurine                                                          | Glycine                  | Agonist            |                                             | 1.050 |
| CCT007093                                                        | Apoptosis                | Activator          | PPM1D                                       | 1.050 |
| 5alpha-Pregnan-3alpha-ol-20-one                                  | GABA                     | Modulator          | GABA-A                                      | 1.049 |
| Ro 04-6790 dihydrochloride                                       | Serotonin                | Antagonist         | 5-HT6                                       | 1.049 |
| Rottlerin                                                        | Phosphorylation          | Inhibitor          | PKC / CaM Kinase III                        | 1.049 |
| Pirenzepine dihydrochloride                                      | Cholinergic              | Antagonist         | M1                                          | 1.049 |
| U-62066                                                          | Opioid                   | Agonist            | kappa                                       | 1.048 |
| Nitrendipine                                                     | Ca2+ Channel             | Antagonist         | L-type                                      | 1.048 |
| Trequinsin hydrochloride                                         | Cyclic Nucleotides       | Inhibitor          | PDE III                                     | 1.048 |
| Aminophylline ethylenediamine                                    | Adenosine                | Antagonist         | A1/A2                                       | 1.046 |
| (-)-Quinpirole hydrochloride                                     | Dopamine                 | Agonist            | D2/D3                                       | 1.046 |
| Cimetidine                                                       | Histamine                | Antagonist         | H2                                          | 1.046 |
| L-732,138                                                        | Tachykinin               | Antagonist         | NK1 > NK2, NK3                              | 1.046 |
| Topotecan hydrochloride hydrate                                  | Apoptosis and Cell Cycle | Inhibitor          | topoisomerase I                             | 1.046 |
| Ritodrine hydrochloride                                          | Adrenoceptor             | Agonist            | beta2                                       | 1.046 |
| 10058-F4                                                         | Apoptosis                | Inhibitor          | c-Myc                                       | 1.045 |
| Spirolactone                                                     | Hormone                  | Antagonist         | Mineralocorticoid                           | 1.045 |
| Tegafur                                                          | Apoptosis                |                    |                                             | 1.044 |
| IRAK-1/4 Inhibitor I                                             | Phosphorylation          | Inhibitor          | IRAK-1/4                                    | 1.044 |
| Estrone                                                          | Hormone                  |                    | Estrogen                                    | 1.044 |
| TCPOBOP                                                          | Transcription            | Agonist            | CAR                                         | 1.044 |
| LP 12 hydrochloride hydrate                                      | Serotonin                | Agonist            | 5-HT7                                       | 1.044 |
| Spermine tetrahydrochloride                                      | Glutamate                | Antagonist         | NMDA-Polyamine                              | 1.043 |
| GW5074                                                           | Phosphorylation          | Inhibitor          | Raf1 kinase                                 | 1.043 |
| Edrophonium chloride                                             | Cholinergic              | Inhibitor          | Acetylcholinesterase                        | 1.043 |
| Tirofiban hydrochloride monohydrate                              | Cell Signaling           | inhibitor          | glycoprotein IIb/IIIa inhibitor             | 1.043 |
| Pseudocantharidin C                                              | Gene Regulation          |                    | PP2A                                        | 1.043 |
| Synephrine                                                       | Adrenoceptor             | Agonist            | alpha                                       | 1.043 |
| Lasofoxifene tartrate                                            | Estrogen                 | Modulator          |                                             | 1.043 |
| Eptifibatid acetate                                              | Anticoagulants           | Inhibitor          | GPIIb/IIIa                                  | 1.043 |
| Phenamil methanesulfonate                                        | Na+ Channel              | Inhibitor          | Amiloride sensitive                         | 1.042 |
| Sulindac                                                         | Prostaglandin            | Inhibitor          | COX                                         | 1.042 |
| Ro 11-1464                                                       | Lipid Signaling          | Activator          | apoA-1                                      | 1.042 |
| Arecoline hydrobromide                                           | Cholinergic              | Agonist            |                                             | 1.042 |
| R(+)-SCH-23390 hydrochloride                                     | Dopamine                 | Antagonist         | D1                                          | 1.041 |
| Imipenem monohydrate                                             | Antibiotic               |                    |                                             | 1.041 |
| PAC-1                                                            | Apoptosis                | Activator          | Caspase 3                                   | 1.040 |
| (-)-Isoproterenol hydrochloride                                  | Adrenoceptor             | Agonist            | beta                                        | 1.040 |
| Cytosine-1-beta-D-arabinofuranoside hydrochloride                | DNA Metabolism           | Inhibitor          |                                             | 1.040 |
| Chlormezanone                                                    | Neurotransmission        | Modulator          | Muscle relaxant                             | 1.039 |
| Isoliquirigenin                                                  | Cyclic Nucleotides       | Activator          | Guanylyl cyclase                            | 1.038 |
| CYM50358                                                         | Lipids                   | Antagonist         | S1P4                                        | 1.038 |
| Triflusal                                                        | Anticoagulants           | Inhibitor          | COX-1                                       | 1.037 |
| Sulfaphenazole                                                   | Multi-Drug Resistance    | Inhibitor          | Cytochrome P4502C                           | 1.037 |
| Vanillic acid diethylamide                                       | Vanilloid                | Agonist            |                                             | 1.037 |
| KB-R7493                                                         | Calcium Channel          | Inhibitor          | NCX                                         | 1.036 |
| ARL 67156 trisodium salt                                         | P2 Receptor              | Inhibitor          | ecto-ATPase                                 | 1.036 |
| Disopyramide phosphate                                           | K+ Channel               | Modulator          |                                             | 1.036 |
| SMER28                                                           | Cell Biology             | Enhancer           | Autophagy                                   | 1.036 |
| Phaclofen                                                        | GABA                     | Antagonist         | GABA-B                                      | 1.036 |
| Riluzole                                                         | Glutamate                | Antagonist         | Release                                     | 1.036 |
| N-p-Tosyl-L-phenylalanine chloromethyl ketone                    | Biochemistry             | Inhibitor          | Chymotrypsin alpha                          | 1.036 |
| beta-Estradiol                                                   | Hormone                  |                    | Estrogen                                    | 1.035 |
| CIQ                                                              | Neurotransmission        | Modulator          | NR2C/NR2D                                   | 1.035 |
| BMS-189453                                                       | Gene Regulation          | Agonist/Antagonist | RAR $\alpha$ , RAR $\beta$ and RAR $\gamma$ | 1.035 |
| IMID-4F hydrochloride                                            | K+ Channel               | Blocker            |                                             | 1.035 |
| Trifluoperazine dihydrochloride                                  | Dopamine                 | Antagonist         | D1/D2                                       | 1.034 |
| Quinidine sulfate                                                | Na+ Channel              | Antagonist         |                                             | 1.034 |
| Clomipramine hydrochloride                                       | Serotonin                | Inhibitor          | Reuptake                                    | 1.034 |
| Ranitidine hydrochloride                                         | Histamine                | Antagonist         | H2                                          | 1.034 |
| Amifostine                                                       | Cell Stress              | Inhibitor          | Cytoprotectant                              | 1.034 |
| Furegrelate sodium                                               | Phosphorylation          | Inhibitor          | Thromboxane synthase                        | 1.034 |
| Bumetanide                                                       | Ion Pump                 | Inhibitor          | Na+K+-2Cl- cotransporter                    | 1.033 |
| SR 142948A                                                       | Cell signaling           | Antagonist         | Neurotensin                                 | 1.033 |
| 1,3-Dimethyl-8-phenylxanthine                                    | Adenosine                | Antagonist         | A1                                          | 1.033 |
| (+)-MK-801 hydrogen maleate                                      | Glutamate                | Antagonist         | NMDA                                        | 1.033 |
| Ifenprodil tartrate                                              | Glutamate                | Blocker            | Polyamine site NMDA                         | 1.032 |
| SB 206553 hydrochloride                                          | Serotonin                | Antagonist         | 5-HT2C/5-HT2B                               | 1.032 |
| S(-)-3PPP hydrochloride                                          | Dopamine                 | Agonist            | D2                                          | 1.032 |
| SC 19220                                                         | Prostaglandin            | Antagonist         | EP1                                         | 1.032 |
| BIA 2-093                                                        | Na+ Channels             | Blocker            |                                             | 1.031 |
| Quercetin dihydrate                                              | Cyclic Nucleotides       | Inhibitor          | PDE                                         | 1.031 |
| Semicarbazide hydrochloride                                      | Neurotransmission        | Inhibitor          | MAO                                         | 1.031 |
| Tetraethylammonium chloride                                      | Cholinergic              | Antagonist         | Nicotinic                                   | 1.031 |
| Uridine 5'-diphosphate sodium                                    | P2 Receptor              | Agonist            | P2Y                                         | 1.031 |
| ANA-12                                                           | Cytokines                |                    | TrkB                                        | 1.030 |
| Roscovitine                                                      | Phosphorylation          | Inhibitor          | CDK                                         | 1.030 |
| O-(Carboxymethyl)hydroxylamine hemihydrochloride                 | Biochemistry             | Inhibitor          | Aminotransferase                            | 1.030 |
| Quinolinic acid                                                  | Glutamate                | Antagonist         | NMDA                                        | 1.030 |
| Anisotropine methyl bromide                                      | Muscarinic               | Antagonist         |                                             | 1.030 |
| Phenylbutazone                                                   | Prostaglandin            | Substrate          | Prostaglandin peroxidase                    | 1.029 |
| JW74                                                             | Transcription            | Inhibitor          | b-catenin/GSK-3b/AXIN/APC/CK1               | 1.029 |
| Ro 8-4304                                                        | Glutamate                | Antagonist         | NMDA-NR2B                                   | 1.029 |
| VU0420373                                                        | Immune Signaling         | Activator          | HssRSmmonoamine oxidase                     | 1.029 |
| N-(2-[4-(4-Chlorophenyl)piperazin-1-yl]ethyl)-3-methoxybenzamide | Dopamine                 | Agonist            | D4                                          | 1.029 |
| Guvacine hydrochloride                                           | GABA                     | Inhibitor          | Uptake                                      | 1.029 |
| Quinelorane dihydrochloride                                      | Dopamine                 | Agonist            | D2                                          | 1.029 |
| Methazolamide                                                    | Enzyme Inhibitors        | Inhibitor          | Carbonic anhydrase                          | 1.029 |
| Isoproterenol hydrochloride                                      | Adrenoceptor             | Agonist            | beta                                        | 1.029 |
| Genipin                                                          | Cell Biology             | Modulator          | UCP2                                        | 1.029 |
| Fluspirilene                                                     | Dopamine                 | Antagonist         | D2/D1                                       | 1.029 |
| Thalidomide                                                      | Cytoskeleton and ECM     | Inhibitor          | TNFalpha                                    | 1.029 |
| R(+)-3PPP hydrochloride                                          | Dopamine                 | Agonist            | D2                                          | 1.028 |
| Aminobenztrpine                                                  | Cholinergic              | Ligand             | Muscarinic                                  | 1.028 |
| Epinastine hydrochloride                                         | Histamine                | Antagonist         | H1                                          | 1.028 |

|                                                          |                                        |                    |                               |       |
|----------------------------------------------------------|----------------------------------------|--------------------|-------------------------------|-------|
| N-Phenylanthranilic acid                                 | Cl- Channel                            | Blocker            |                               | 1.028 |
| Galloflavin potassium                                    | Cell Stress                            | Inhibitor          | LDN-A/B                       | 1.028 |
| Cephalothin sodium                                       | Antibiotic                             |                    | Cell wall synthesis           | 1.027 |
| Methoctramine tetrahydrochloride                         | Cholinergic                            | Antagonist         | M2                            | 1.027 |
| (±)-6-Chloro-PB hydrobromide                             | Dopamine                               | Agonist            | D1                            | 1.027 |
| GW9508                                                   | Lipids                                 | Agonist            | FFA1/GPR40                    | 1.026 |
| Pregnenolone sulfate sodium                              | GABA                                   | Antagonist         | GABA-A                        | 1.026 |
| H2L5186303                                               | Lipids                                 | Inhibitor          | LP2A                          | 1.026 |
| Protriptyline hydrochloride                              | Adrenoceptor                           | Blocker            | Reuptake                      | 1.025 |
| O-Phospho-L-serine                                       | Glutamate                              | Antagonist         | NMDA                          | 1.025 |
| WIN 62,577                                               | Tachykinin                             | Antagonist         | NK1                           | 1.025 |
| Prazosin hydrochloride                                   | Adrenoceptor                           | Antagonist         | alpha1                        | 1.025 |
| 1,10-Phenanthroline monohydrate                          | Biochemistry                           | Inhibitor          | Metalloprotease               | 1.024 |
| Molsidomine                                              | Nitric Oxide                           | Donor              |                               | 1.024 |
| Gabaculine hydrochloride                                 | GABA                                   | Inhibitor          | GABA transaminase             | 1.024 |
| DL-alpha-Methyl-p-tyrosine                               | Neurotransmission                      | Inhibitor          | Tyrosine hydroxylase          | 1.024 |
| JS-K                                                     | Nitric Oxide                           | Donor              |                               | 1.024 |
| SKF 83959 hydrobromide                                   | Dopamine                               | Agonist            | D1                            | 1.023 |
| Ranolazine dihydrochloride                               | Lipid                                  | Inhibitor          | pFOX                          | 1.023 |
| SB 216763                                                | Phosphorylation                        | Inhibitor          | GSK-3                         | 1.023 |
| Nedocromil                                               | Immune Signaling                       | Stabilizer         | Mast cell                     | 1.023 |
| Aconitine                                                | Ion Pump                               | Blocker            | Na+/H+ Antiporter             | 1.023 |
| Ruthenium red                                            | Ion Pump                               | Inhibitor          | Mitochondrial uniporter       | 1.022 |
| DFU                                                      | Lipids                                 | Inhibitor          | COX-2                         | 1.022 |
| Tyrphostin AG 538                                        | Apoptosis                              | Inhibitor          | Pin-1                         | 1.022 |
| SC-514                                                   | Phosphorylation                        | Inhibitor          | IKK-2                         | 1.022 |
| Tienilic acid                                            | MultiDrug Resistance                   | Inhibitor          | P450                          | 1.022 |
| alpha,beta-Methylene adenosine 5'-triphosphate dilithium | P2 Receptor                            | Agonist            | P2X > P2Y                     | 1.022 |
| Phosphonoacetic acid                                     | DNA                                    | Inhibitor          | DNA Polymerase                | 1.022 |
| Vinpocetine                                              | Cyclic Nucleotides                     | Inhibitor          | PDE 1                         | 1.021 |
| Tyrphostin 1                                             | Phosphorylation                        | Inhibitor          | EGFR                          | 1.021 |
| Rilmenidine hemifumarate                                 | Imidazole                              | Agonist            | I1                            | 1.021 |
| Myricetin                                                | Phosphorylation                        | Inhibitor          | Casein Kinase II              | 1.021 |
| N6-2-(4-Aminophenyl)ethyladenosine                       | Adenosine                              | Agonist            | A3                            | 1.021 |
| D-609 potassium                                          | Lipid                                  | Inhibitor          | PIPLC                         | 1.021 |
| 7-Chloro-4-hydroxy-2-phenyl-1,8-naphthyridine            | Adenosine                              | Antagonist         | A1                            | 1.021 |
| YC-1                                                     | Cyclic Nucleotides                     | Activator          | Guanylyl cyclase              | 1.021 |
| Retinoic acid                                            | Apoptosis                              | Activator          |                               | 1.021 |
| trans-(7)-ACPD                                           | Glutamate                              | Agonist            | Metabotropic                  | 1.020 |
| Trihexyphenidyl hydrochloride                            | Cholinergic                            | Antagonist         | Muscarinic                    | 1.020 |
| Phosphoramidon disodium                                  | Biochemistry                           | Inhibitor          | Endopeptidase                 | 1.020 |
| Bendamustine hydrochloride                               | Apoptosis                              |                    |                               | 1.019 |
| 7,8-Dihydroxyflavone hydrate                             | Cytokines, Growth Factors and Hormones | Agonist            | TrkB                          | 1.019 |
| Moxonidine hydrochloride                                 | Adrenoceptor                           | Agonist            | alpha2A                       | 1.019 |
| Betaxolol hydrochloride                                  | Adrenoceptor                           | Antagonist         | beta1                         | 1.019 |
| Cirazoline hydrochloride                                 | Adrenoceptor                           | Agonist            | alpha1A                       | 1.019 |
| Pyrocatechol                                             | Cell Cycle                             | Inhibitor          |                               | 1.019 |
| Nomifensine maleate                                      | Dopamine                               | Inhibitor          | Reuptake                      | 1.019 |
| Valproic acid sodium                                     | Anticonvulsant                         |                    |                               | 1.019 |
| Amisulpride                                              | Dopamine                               | Antagonist         | D2/D3                         | 1.019 |
| Urapidil hydrochloride                                   | Adrenoceptor                           | Antagonist         | alpha1                        | 1.019 |
| Ezatiostat                                               | Cell signaling                         | Inhibitor          | GSTP1-1                       | 1.018 |
| (-)-Scopolamine methyl nitrate                           | Cholinergic                            | Antagonist         | Muscarinic                    | 1.018 |
| 1-Phenyl-3-(2-thiazolyl)-2-thiourea                      | Dopamine                               | Inhibitor          | beta-Hydroxylase              | 1.018 |
| JNJ-40418677                                             | Neurobiology                           | Modulator          | gamma-Secretase               | 1.018 |
| Kenpaullone                                              | Phosphorylation                        | Inhibitor          | CDK1, CDK2, CDK5              | 1.017 |
| 5-Hydroxyindolacetic acid                                | Serotonin                              | Metabolite         |                               | 1.017 |
| 1-Methylnicotinamide chloride                            | Inflammation                           | Metabolite         |                               | 1.016 |
| Steviol                                                  | Ion Channels                           | Inhibitor          | hOAT1/hOAT3                   | 1.016 |
| RU-SKI 43 maleate                                        | Cytokines                              | Inhibitor          | Hhat                          | 1.016 |
| Amantadine hydrochloride                                 | Dopamine                               | Releaser           |                               | 1.016 |
| Minocycline hydrochloride                                | Cell Cycle                             | Inhibitor          |                               | 1.016 |
| D-Serine                                                 | Glutamate                              | Agonist            | NMDA-Glycine                  | 1.016 |
| Aminoguanidine hemisulfate                               | Nitric Oxide                           | Inhibitor          | NOS                           | 1.016 |
| Bay 11-7082                                              | Phosphorylation                        | Inhibitor          | IKB-alpha                     | 1.016 |
| Lamotrigine isethionate                                  | Cell Signaling and Neuroscience        |                    |                               | 1.015 |
| JFD00244                                                 | Gene Regulation                        | Inhibitor          | SIRT                          | 1.015 |
| Sanguinarine chloride                                    | Ion Pump                               | Inhibitor          | Na+/K+ ATPase                 | 1.014 |
| Metaproterenol hemisulfate                               | Adrenoceptor                           | Agonist            | beta2                         | 1.014 |
| Tropicamide                                              | Cholinergic                            | Antagonist         | M4                            | 1.014 |
| Oxotremorine sesquifumarate salt                         | Cholinergic                            | Agonist            | M2                            | 1.014 |
| Demeclocycline hydrochloride                             | Antibiotic                             |                    | Protein synthesis             | 1.014 |
| L-165,041                                                | Lipid Signaling                        | Agonist            | PPAR-gamma                    | 1.014 |
| Triprolidine hydrochloride                               | Histamine                              | Antagonist         | H1                            | 1.014 |
| 7,7-Dimethyl-(5Z,8Z)-eicosadienoic acid                  | Lipid                                  | Inhibitor          | PLA2 / Lipoxigenase           | 1.013 |
| 6-Methoxy-1,2,3,4-tetrahydro-9H-pyrido[3,4b] indole      | Neurotransmission                      | Inhibitor          | MAO                           | 1.013 |
| Tetrabenazine                                            | Neurotransmission                      | Inhibitor          | VMAT                          | 1.013 |
| DL-threo-beta-hydroxyaspartic acid                       | Glutamate                              | Inhibitor          | Transport                     | 1.012 |
| Bexarotene                                               | Gene Regulation                        | Agonist            | RXR                           | 1.012 |
| Gilipizide                                               | K+ Channel                             | Blocker            | ATP-sensitive                 | 1.012 |
| 5-Hydroxy-L-tryptophan                                   | Serotonin                              | Precursor          |                               | 1.012 |
| Zanamivir                                                | Antiviral                              |                    | Viral neuraminidase           | 1.011 |
| 2,3-Butanedione                                          | Cytoskeleton and ECM                   | Inhibitor          | Myosin ATPase                 | 1.011 |
| Acetylthiocholine chloride                               | Cholinergic                            | Agonist            | Nicotinic                     | 1.011 |
| Hydrochlorothiazide                                      | Biochemistry                           | Inhibitor          | Carbonic anhydrase            | 1.011 |
| 6-Hydroxymelatonin                                       | Melatonin                              | Metabolite         |                               | 1.011 |
| SDZ-205,557 hydrochloride                                | Serotonin                              | Antagonist         | 5-HT4                         | 1.011 |
| 3-alpha,21-Dihydroxy-5-alpha-pregnan-20-one              | GABA                                   | Modulator          | GABA-A                        | 1.011 |
| (-)-Scopolamine hydrobromide                             | Cholinergic                            | Antagonist         | Muscarinic                    | 1.011 |
| S(+)-Raclopride L-tartrate                               | Dopamine                               | Antagonist         | D2                            | 1.011 |
| Hexamethonium dichloride                                 | Cholinergic                            | Antagonist         | Nicotinic                     | 1.011 |
| SR 27897 hydrate                                         | Cholecystokinin                        | Antagonist         | CCK1                          | 1.010 |
| Pivmecillinam                                            | Antibiotics                            | Inhibitor          | PBP2                          | 1.010 |
| DL-p-Chlorophenylalanine methyl ester hydrochloride      | Neurotransmission                      | Inhibitor          | Tryptophan hydroxylase        | 1.009 |
| GABA                                                     | GABA                                   | Agonist            |                               | 1.009 |
| Tetraoisopropyl pyrophosphoramidate                      | Biochemistry                           | Inhibitor          | Butyrylcholinesterase         | 1.009 |
| Verapamil hydrochloride                                  | Ca2+ Channel                           | Modulator          | L-type                        | 1.009 |
| SKF 95282 dimaleate                                      | Histamine                              | Antagonist         | H2                            | 1.008 |
| 1-Phenylbiguanide                                        | Serotonin                              | Agonist            | 5-HT3                         | 1.008 |
| Forskolin                                                | Cyclic Nucleotides                     | Activator          | Adenylate cyclase             | 1.008 |
| Benzamil hydrochloride                                   | Ion Pump                               | Blocker            | Na+/H+, Na+/Ca2+ Pump         | 1.008 |
| 3-Aminopropylphosphonic acid                             | GABA                                   | Agonist            | GABA-B                        | 1.008 |
| N-Acetylprocainamide hydrochloride                       | Na+ Channel                            | Blocker            |                               | 1.008 |
| Ibandronate sodium                                       | Lipid Signaling                        | Inhibitor          | Farnesyl diphosphate synthase | 1.008 |
| ML-9                                                     | Phosphorylation                        | Inhibitor          | MLCK                          | 1.007 |
| 5-hydroxydecanoic acid sodium                            | K+ Channel                             | Blocker            |                               | 1.007 |
| Tetrahydrozoline hydrochloride                           | Adrenoceptor                           | Agonist            | alpha                         | 1.006 |
| Filbanserin                                              | Serotonin                              | Agonist/Antagonist | 5-HT1A /5-HT2A                | 1.006 |
| Alloxazine                                               | Adenosine                              | Antagonist         | A2b                           | 1.006 |
| (-)-Scopolamine,n-Butyl- bromide                         | Cholinergic                            | Antagonist         | Muscarinic                    | 1.006 |
| U-74389G maleate                                         | Cell Stress                            | Inhibitor          |                               | 1.006 |
| GR 5562 dihydrobromide                                   | Serotonin                              | Antagonist         | 5-HT1B/1D                     | 1.006 |
| 5,5-Dimethyl-1-pyrroline-N-oxide                         | Cell Stress                            | Inhibitor          | Antioxidant                   | 1.006 |
| INDY                                                     | Kinase/Phosphatase                     | Inhibitor          | Dyrk1A and Dyrk1B             | 1.006 |
| ML 230                                                   | Multi-drug resistance                  | Inhibitor          | BCRP                          | 1.006 |
| XCT790                                                   | Gene Regulation                        | Inverse Agonist    | ERRalpha                      | 1.005 |
| Dobutamine hydrochloride                                 | Adrenoceptor                           | Agonist            | beta1                         | 1.005 |

|                                                         |                                 |                 |                                                    |       |
|---------------------------------------------------------|---------------------------------|-----------------|----------------------------------------------------|-------|
| (S)-Propranolol hydrochloride                           | Adrenoceptor                    | Blocker         | beta                                               | 1.005 |
| Thiopropamide maleate                                   | Histamine                       | Antagonist      | H3                                                 | 1.005 |
| Ro 25-6981 hydrochloride                                | Glutamate                       | Antagonist      | NMDA-NR2B                                          | 1.005 |
| CPCCOEt                                                 | Cell Signaling and Neuroscience | Antagonist      | mGluR1                                             | 1.004 |
| Azathioprine                                            | P2 Receptor                     | Inhibitor       | Purine synthesis                                   | 1.004 |
| Carbamazepine                                           | Anticonvulsant                  |                 |                                                    | 1.004 |
| Rollipram                                               | Cyclic Nucleotides              | Inhibitor       | PDE IV                                             | 1.004 |
| Phloretin                                               | Ca2+ Channel                    | Blocker         | L-Type                                             | 1.004 |
| Tomoxetine                                              | Adrenoceptor                    | Inhibitor       | Reuptake                                           | 1.004 |
| L-2-aminoadipic acid                                    | Glutamate                       | Inhibitor       | Glutamine synthetase                               | 1.004 |
| L-798106                                                | Lipids                          | Antagonist      | EP3                                                | 1.004 |
| Mecamylamine hydrochloride                              | Cholinergic                     | Antagonist      | Nicotinic                                          | 1.003 |
| SB 200646 hydrochloride                                 | Serotonin                       | Antagonist      | 5-HT2C/2B                                          | 1.003 |
| ATPA                                                    | Glutamate                       | Agonist         | Kainate                                            | 1.003 |
| cDPCP                                                   | Cell Cycle                      |                 | DNA-N7 of guanosine                                | 1.003 |
| Bicalutamide (CDX)                                      | Gene Regulation                 | Antagonist      | AR                                                 | 1.003 |
| Cantharidic Acid                                        | Phosphorylation                 | Inhibitor       | PP1 / PP2A                                         | 1.003 |
| SB 415286                                               | Phosphorylation                 | Inhibitor       | GSK-3                                              | 1.003 |
| Py6                                                     | Calcium Channel Modulator       | Inhibitor       | STIM1/Orai1                                        | 1.003 |
| L-DOPS                                                  | Adrenergics                     | Agonist         |                                                    | 1.003 |
| 17alpha-hydroxyprogesterone                             | Hormone                         | Metabolite      | Progesterone                                       | 1.003 |
| Tetramisole hydrochloride                               | Phosphorylation                 | Inhibitor       | Phosphatase                                        | 1.003 |
| Dantrolene sodium                                       | Intracellular Calcium           | Inhibitor       | Release                                            | 1.002 |
| A-68930 hydrochloride                                   | Dopamine                        | Agonist         | D1                                                 | 1.002 |
| Sepiapterin                                             | Nitric Oxide                    | Cofactor        | NOS                                                | 1.002 |
| Acetylsalicylic acid                                    | Prostaglandin                   | Inhibitor       | COX-3 > COX-1 > COX-2                              | 1.002 |
| Ancitabine hydrochloride                                | DNA Metabolism                  | Inhibitor       |                                                    | 1.002 |
| (+)-CP-99994 dihydrochloride                            | Tachykinins                     | Antagonist      | NK-1                                               | 1.002 |
| Sodium Oxamate                                          | Biochemistry                    | Inhibitor       | Lactate Dehydrogenase                              | 1.002 |
| Quinacrine dihydrochloride                              | Neurotransmission               | Inhibitor       | MAO                                                | 1.002 |
| 5-Carboxamidotryptamine maleate                         | Serotonin                       | Agonist         | 5-HT7                                              | 1.002 |
| Tyrphostin AG 112                                       | Phosphorylation                 | Inhibitor       | Tyrosine kinase                                    | 1.001 |
| MK-912                                                  | Adrenoceptor                    | Agonist         | alpha2A                                            | 1.001 |
| Propranolol hydrochloride                               | Adrenoceptor                    | Antagonist      | beta                                               | 1.001 |
| Cortisone 21-acetate                                    | Hormone                         |                 | Cortisol                                           | 1.001 |
| Sumanriole maleate                                      | Dopaminergics                   | Agonist         | D2                                                 | 1.001 |
| Lorglumide sodium                                       | Cholecystokinin                 | Antagonist      | CCK-A                                              | 1.000 |
| SB 204741                                               | Serotonin                       | Antagonist      | 5-HT2B                                             | 1.000 |
| AEG 3482                                                | Heat Shock Proteins             |                 | HSP90                                              | 0.999 |
| Memantine hydrochloride                                 | Glutamate                       | Antagonist      | NMDA                                               | 0.999 |
| SNC80                                                   | Opioid                          | Agonist         | delta                                              | 0.999 |
| DL-Thiorphan                                            | Neurotransmission               | Inhibitor       | Enkephalinase                                      | 0.999 |
| (-)-Cotinine                                            | Cholinergic                     | Metabolite      | Nicotinic                                          | 0.999 |
| CID2858522                                              | Gene Regulation                 | Inhibitor       | NF-kB                                              | 0.999 |
| Doxycycline hydrochloride                               | Antibiotic                      |                 | Protein synthesis                                  | 0.999 |
| Piperlongumine                                          | Apoptosis                       | inhibitor       | GSTP1                                              | 0.999 |
| Valganciclovir hydrochloride hydrate                    | Antiviral                       | Inhibitor       | DNA Polymerase                                     | 0.999 |
| Altretamine                                             | DNA Metabolism                  | Inhibitor       |                                                    | 0.999 |
| Clotrimazole                                            | K+ Channel                      | Inhibitor       | Ca2+-activated K+ channel                          | 0.999 |
| Reactive Blue 2                                         | P2 Receptor                     | Antagonist      | P2Y                                                | 0.999 |
| Cyclobenzaprine hydrochloride                           | Serotonin                       | Antagonist      | 5-HT2                                              | 0.999 |
| FAUC 213                                                | Dopamine                        | Antagonist      | D4                                                 | 0.999 |
| Imipramine hydrochloride                                | Serotonin                       | Blocker         | Reuptake                                           | 0.998 |
| R(+)-6-Bromo-APB hydrobromide                           | Dopamine                        | Agonist         | D1/D5                                              | 0.998 |
| Donitriptan monohydrochloride                           | Neurotransmission               | Agonist         | 5-HT1B/1D                                          | 0.998 |
| NSC 95397                                               | Phosphorylation                 | Inhibitor       | Cdc25                                              | 0.998 |
| p-Benzoguinone                                          | DNA Repair                      | Inhibitor       | G:C site                                           | 0.998 |
| Ceftriaxone sodium                                      | Antibiotic                      |                 | Cell wall synthesis                                | 0.998 |
| AB-MECA                                                 | Adenosine                       | Agonist         | A3                                                 | 0.997 |
| 9-Amino-1,2,3,4-tetrahydroacridine hydrochloride        | Cholinergic                     | Inhibitor       | Cholinesterase                                     | 0.997 |
| Carbetapentane citrate                                  | Opioid                          | Ligand          | sigma1                                             | 0.997 |
| KT203                                                   | Neurotransmission,              | Inhibitor       | ABHD6                                              | 0.997 |
| (-)-Perillic acid                                       | G protein                       | Inhibitor       | p21 Ras                                            | 0.997 |
| S-(+)-Fluoxetine hydrochloride                          | Serotonin                       | Inhibitor       | Reuptake                                           | 0.997 |
| Promethazine hydrochloride                              | Histamine                       | Antagonist      | H1                                                 | 0.997 |
| Rivastigmine tartrate                                   | Cholinergics                    | Inhibitor       | cholinesterase                                     | 0.997 |
| Tetracaine hydrochloride                                | Na+ Channel                     | Modulator       |                                                    | 0.997 |
| Phenytoin sodium                                        | Anticonvulsant                  |                 |                                                    | 0.997 |
| Vanillylmandelic acid                                   | Adrenoceptor                    | Metabolite      |                                                    | 0.997 |
| Hexahydro-sila-difenidol hydrochloride, p-fluoro analog | Cholinergic                     | Antagonist      | M3>M1>M2                                           | 0.997 |
| N-Methylhistadipriden dioxalate salt                    | Histamine                       | Agonist         | H1                                                 | 0.996 |
| Brinzolamide                                            | anhydrases                      | Inhibitor       | anhydrase II                                       | 0.996 |
| Picrotoxin                                              | GABA                            | Antagonist      | GABA-C                                             | 0.996 |
| Mifamurtide                                             | Immune cell signaling           | immunostimulant |                                                    | 0.996 |
| Carbachol                                               | Cholinergic                     | Agonist         |                                                    | 0.996 |
| Methapyrilene hydrochloride                             | Histamine                       | Antagonist      | H1                                                 | 0.995 |
| Citalopram hydrobromide                                 | Serotonin                       | Inhibitor       | Reuptake                                           | 0.995 |
| Ganaxolone                                              | GABA                            | Modulator       | GABA-A                                             | 0.995 |
| Hydroquinone                                            | Leukotriene                     | Inhibitor       | Arachidonate 12-Lipoxygenase                       | 0.995 |
| SB 205384                                               | GABA                            | Modulator       | GABA-A                                             | 0.995 |
| Cantharidin                                             | Phosphorylation                 | Inhibitor       | PP2A                                               | 0.995 |
| Tranylcypromine hydrochloride                           | Neurotransmission               | Inhibitor       | MAO                                                | 0.995 |
| Felbamate                                               | Glutamate                       | Antagonist      |                                                    | 0.995 |
| WAY-100635 maleate                                      | Serotonin                       | Antagonist      | 5-HT1A                                             | 0.994 |
| Tetradecylthioacetic acid                               | Transcription                   | Agonist         | PPAR-alpha                                         | 0.994 |
| Terbutaline hemisulfate                                 | Adrenoceptor                    | Agonist         | beta                                               | 0.994 |
| Na-p-Tosyl-L-lysine chloromethyl ketone hydrochloride   | Cyclic Nucleotides              | Inhibitor       | Adenylyl cyclase                                   | 0.994 |
| DL-Cycloserine                                          | Sphingolipid                    | Inhibitor       | Ketosphinganine synthase, Alanine aminotransferase | 0.994 |
| GYKI 52466 hydrochloride                                | Glutamate                       | Antagonist      | AMPA/kainate                                       | 0.994 |
| p-Aminoglutethimide                                     | Biochemistry                    | Inhibitor       | P450-dependent hydroxylation                       | 0.994 |
| THIP hydrochloride                                      | GABA                            | Agonist         | GABA-A                                             | 0.994 |
| Acetohexamide                                           | Hormone                         | Releaser        | Insulin                                            | 0.994 |
| BRL 54443 maleate                                       | Serotonin                       | Agonist         | 5-HT1E/1F                                          | 0.994 |
| Dofequidar fumarate                                     | Mult-Drug Resistance            | Inhibitor       | MDR-1                                              | 0.994 |
| alpha-Lipoic Acid                                       | Cell Stress                     | Coenzyme        | Pyruvate dehydrogenase                             | 0.994 |
| Pheniramine maleate                                     | Histamine                       | Antagonist      | H1                                                 | 0.993 |
| 8-(4-Chlorophenylthio)-cAMP sodium                      | Cyclic Nucleotides              | Activator       |                                                    | 0.993 |
| Efavirenz                                               | Gene Regulation                 | Inhibitor       | Reverse transcriptase                              | 0.993 |
| Tyrphostin 23                                           | Phosphorylation                 | Inhibitor       | EGFR                                               | 0.993 |
| Cephalosporin C zinc salt                               | Antibiotic                      |                 | Cell wall synthesis                                | 0.993 |
| Ibuprofen                                               | Prostaglandin                   | Inhibitor       | COX                                                | 0.992 |
| Phentolamine mesylate                                   | Adrenoceptor                    | Antagonist      | alpha                                              | 0.992 |
| Hypotaurine                                             | Cell Stress                     | Inhibitor       | Antioxidant                                        | 0.992 |
| Acepromazine maleate                                    | neurotransmission               | Antagonist      |                                                    | 0.992 |
| Nimodipine                                              | Ca2+ Channel                    | Antagonist      | L-type                                             | 0.992 |
| Tulobuterol hydrochloride                               | Adrenoceptor                    | Agonist         | beta                                               | 0.991 |
| Mifepristone                                            | Hormone                         | Antagonist      | Progesterone                                       | 0.991 |
| CYM-5520                                                | Neurotransmission               | Agonist         | S1PR2;                                             | 0.991 |
| A-77636 hydrochloride                                   | Dopamine                        | Agonist         | D1                                                 | 0.990 |
| Eliprodil                                               | Glutamate                       | Antagonist      | NMDA-polyamine                                     | 0.990 |
| Cefsulodin sodium salt hydrate                          | Antibiotic                      |                 | Cell wall synthesis                                | 0.990 |
| (±)-7-Hydroxy-DPAT hydrobromide                         | Dopamine                        | Agonist         | D3                                                 | 0.990 |
| EMPA                                                    | Orexin                          | Antagonist      | OXR2                                               | 0.990 |
| Acetamide                                               | Biochemistry                    | Inhibitor       | Carbonic anhydrase                                 | 0.990 |
| Imidazole-4-acetic acid hydrochloride                   | GABA                            | Antagonist      | GABA-C                                             | 0.990 |
| GNF-5                                                   | Phosphorylation                 | Inhibitor       | BRC-Abi                                            | 0.990 |
| L-741,626                                               | Dopamine                        | Antagonist      | D2                                                 | 0.990 |

|                                               |                            |                     |                               |       |
|-----------------------------------------------|----------------------------|---------------------|-------------------------------|-------|
| Psora-4                                       | K+ Channel                 | Inhibitor           | Kv1.3                         | 0.990 |
| Pyrazinocarboxamide                           | Antibiotic                 |                     |                               | 0.990 |
| Labetalol hydrochloride                       | Adrenoceptor               | Antagonist          | beta                          | 0.989 |
| Resveratrol                                   | Prostaglandin              | Inhibitor           | COX                           | 0.989 |
| Cefotaxime sodium                             | Antibiotic                 |                     | Cell wall synthesis           | 0.989 |
| L-Histidine hydrochloride                     | Histamine                  | Precursor           |                               | 0.989 |
| Tolbutamide                                   | Hormone                    | Releaser            | Insulin                       | 0.989 |
| 3,4-Dihydroxyphenylacetic acid                | Dopamine                   | Metabolite          |                               | 0.989 |
| Cefaclor                                      | Antibiotic                 |                     | Cell wall synthesis           | 0.989 |
| N-Acetyl-L-Cysteine                           | Glutamate                  | Antagonist          |                               | 0.989 |
| CNS-1102                                      | Glutamate                  | Antagonist          | NMDA                          | 0.989 |
| L-Hyoscyamine                                 | Cholinergic                | Antagonist          |                               | 0.988 |
| N-(4-Amino-2-chlorophenyl)phthalimide         | Anticonvulsant             |                     |                               | 0.988 |
| Guanabenz acetate                             | Adrenoceptor               | Agonist             | alpha2                        | 0.988 |
| 4-DAMP methiodide                             | Cholinergic                | Antagonist          | M3                            | 0.988 |
| Fenoldopam bromide                            | Dopamine                   | Agonist             | D1                            | 0.988 |
| D-ribofuranosylbenzimidazole                  | Transcription              | Inhibitor           |                               | 0.988 |
| Piceatannol                                   | Phosphorylation            | Inhibitor           | Syk / Lck                     | 0.988 |
| L-Beta-threo-benzyl-aspartate                 | Neurotransmission          | Antagonist          | EAAT3                         | 0.988 |
| 5-Bromo-2'-deoxyuridine                       | DNA Metabolism             | Inhibitor           |                               | 0.988 |
| Mitoxantrone                                  | DNA Metabolism             | Inhibitor           |                               | 0.988 |
| Ivermectin                                    | Cholinergic                | Modulator           | alpha7 nACh                   | 0.987 |
| 5-(N-Ethyl-N-isopropyl)amiloride              | Ion Pump                   | Blocker             | Na+/H+ Antiporter             | 0.987 |
| Sertraline hydrochloride                      | Serotonin                  | Inhibitor           | Reuptake                      | 0.987 |
| AMT hydrochloride                             | Nitric Oxide               | Inhibitor           | iNOS                          | 0.987 |
| Diazoxide                                     | K+ Channel                 | Activator           | ATP-sensitive                 | 0.987 |
| Granisetron hydrochloride                     | Serotonin                  | Antagonist          | 5-HT3                         | 0.987 |
| Diacylglycerol Kinase Inhibitor II            | Phosphorylation            | Inhibitor           | Diacylglycerol kinase         | 0.987 |
| Naftopidil dihydrochloride                    | Adrenoceptor               | Antagonist          | alpha1                        | 0.987 |
| Ritanserine                                   | Serotonin                  | Antagonist          | 5-HT2/5-HT1C                  | 0.987 |
| Caffeic acid phenethyl ester                  | Cell Cycle                 | Inhibitor           | NFkB                          | 0.987 |
| RX 821002 hydrochloride                       | Adrenoceptor               | Antagonist          | alpha2                        | 0.987 |
| Cyproheptadine hydrochloride                  | Serotonin                  | Antagonist          | 5-HT2                         | 0.987 |
| Tolazamide                                    | Hormone                    | Releaser            | Insulin                       | 0.987 |
| (-)-Physostigmine                             | Cholinergic                | Inhibitor           | Cholinesterase                | 0.986 |
| (-)-MK-801 hydrogen maleate                   | Glutamate                  | Antagonist          | NMDA                          | 0.986 |
| rac BHEF                                      | Neurotransmission          | modulator           | GABA-B                        | 0.986 |
| Bisdemethoxycurcumin                          | Ion Channels               | Inhibitor           |                               | 0.986 |
| 9-cyclopentyladenine                          | Cyclic Nucleotides         | Inhibitor           | Adenylate cyclase             | 0.986 |
| Chloroquine diphosphate                       | DNA                        | Intercalator        | DNA                           | 0.986 |
| YS-035 hydrochloride                          | Ca2+ Channel               | Blocker             | L-type                        | 0.986 |
| Olanzapine                                    | Dopaminergics              | Antagonists         | 5-HT2, D1/D2                  | 0.986 |
| L-allylglycine                                | Biochemistry               | Inhibitor           | Glutamic acid decarboxylase   | 0.986 |
| DL-Homatropine hydrobromide                   | Cholinergic                | Antagonist          | Muscarinic                    | 0.985 |
| 6-Aminoheptanoic acid                         | Immune System              | Inhibitor           | Blood Clotting                | 0.985 |
| ODQ                                           | Cyclic Nucleotides         | Inhibitor           | NO-sensitive guanylyl cyclase | 0.985 |
| Fenoterol hydrobromide                        | Adrenoceptor               | Agonist             | beta2                         | 0.985 |
| Benzamide                                     | Apoptosis                  | Inhibitor           | PARS                          | 0.985 |
| SB 269970 hydrochloride                       | Serotonin                  | Antagonist          | 5-HT7                         | 0.985 |
| Bethanechol chloride                          | Cholinergic                | Agonist             | Muscarinic                    | 0.985 |
| N-Acetyl-5-hydroxytryptamine                  | Melatonin                  | Precursor           |                               | 0.985 |
| Oxymetazoline hydrochloride                   | Adrenoceptor               | Agonist             | alpha2A                       | 0.985 |
| Proprantheline bromide                        | Cholinergic                | Antagonist          | Muscarinic                    | 0.984 |
| Theophylline                                  | Adenosine                  | Antagonist          | A1 > A2                       | 0.984 |
| Indomethacin                                  | Prostaglandin              | Inhibitor           | COX                           | 0.984 |
| Pentamidine isethionate                       | Glutamate                  | Antagonist          | NMDA                          | 0.984 |
| Droxinostat                                   | Gene Regulation            | Inhibitor           | HDAC3, HDAC6, and HDAC8       | 0.984 |
| Cortisolone                                   | Hormone                    | Precursor           | Cortisol                      | 0.984 |
| Xylazine hydrochloride                        | Adrenoceptor               | Agonist             | alpha2                        | 0.984 |
| Orphenadrine hydrochloride                    | Cholinergic                | Antagonist          | Muscarinic                    | 0.984 |
| 2,3-Dimethoxy-1,4-naphthoquinone              | Cell Stress                | Modulator           |                               | 0.984 |
| Chloro-APB hydrobromide                       | Dopamine                   | Agonist             | D1                            | 0.984 |
| BW 723C86                                     | Serotonin                  | Agonist             | 5-HT2B                        | 0.984 |
| NS-1619                                       | K+ Channel                 | Activator           | Ca2+ activated                | 0.984 |
| U0126                                         | Phosphorylation            | Inhibitor           | MEK1/MEK2                     | 0.984 |
| Triflupromazine hydrochloride                 | Dopamine                   | Antagonist          | D2                            | 0.984 |
| IMS2186                                       | Cell Cycle                 | Inhibition          | G2                            | 0.983 |
| (-)-Eseroline fumarate                        | Cholinergic                | Inhibitor           | Cholinesterase                | 0.983 |
| Artemether                                    | Immunomodulators and Antib |                     |                               | 0.983 |
| Fenobam                                       | Glutamate                  | Antagonist          | mGluR5                        | 0.983 |
| 2-Phenylaminoadenosine                        | Adenosine                  | Agonist             | A2 > A1                       | 0.983 |
| Felodipine                                    | Ca2+ Channel               | Blocker             | L-type                        | 0.983 |
| Caroverine hydrochloride                      | Glutamatergics             | Antagonist          | NMDA/AMPA                     | 0.983 |
| Mianserin hydrochloride                       | Serotonin                  | Antagonist          |                               | 0.983 |
| Nestorone                                     | Lipid Signaling            | Agonist             | Progesterone receptor         | 0.983 |
| CP-31398 dihydrochloride hydrate              | Apoptosis and Cell Cycle   |                     | p53                           | 0.983 |
| Progesterone                                  | Hormone                    |                     | Progesterone                  | 0.982 |
| Ro 20-1724                                    | Cyclic Nucleotides         | Inhibitor           | cAMP phosphodiesterase        | 0.982 |
| Enalaprilat dihydrate                         | Neurotransmitters          | Inhibitor           |                               | 0.982 |
| HEMADO                                        | Adenosine                  | Agonist             | A3                            | 0.982 |
| Oxybutynin Chloride                           | Cholinergic                | Antagonist          | Muscarinic                    | 0.982 |
| Retinoic acid p-hydroxyanilide                | Cell Cycle                 | Inhibitor           |                               | 0.982 |
| Acetazolamide                                 | Biochemistry               | Inhibitor           | Carbonic anhydrase            | 0.982 |
| Yohimbine hydrochloride                       | Adrenoceptor               | Antagonist          | alpha2                        | 0.982 |
| Telenzepine dihydrochloride                   | Cholinergic                | Antagonist          | M1                            | 0.982 |
| ZM 39923 hydrochloride                        | Phosphorylation            | Inhibitor           | JNK-3                         | 0.982 |
| Raloxifene hydrochloride                      | Hormone                    | Modulator           | ER                            | 0.981 |
| Biperiden hydrochloride                       | Cholinergic                | Antagonist          | muscarinic                    | 0.981 |
| BRL 37344 sodium                              | Adrenoceptor               | Agonist             | beta3                         | 0.981 |
| Sotalol hydrochloride                         | Adrenoceptor               | Antagonist          | beta                          | 0.981 |
| L-Arginine                                    | Nitric Oxide               | Precursor           |                               | 0.981 |
| N-Oleoyl ethanolamine                         | Sphingolipid               | Inhibitor           | Ceramidase                    | 0.981 |
| Ammonium pyrrolidinedithiocarbamate           | Nitric Oxide               | Modulator           | NOS                           | 0.981 |
| Amiodarone hydrochloride                      | Adrenoceptor               | Agonist             | alpha/beta                    | 0.981 |
| 1-Allyl-3,7-dimethyl-8-p-sulphophenylxanthine | Adenosine                  | Antagonist          | A2                            | 0.980 |
| Dipropylidopamine hydrobromide                | Dopamine                   | Agonist             |                               | 0.980 |
| R(-)-Desmethyldiprenyl hydrochloride          | Neurotransmission          | Inhibitor           | MAO-B                         | 0.980 |
| Palonosetron hydrochloride                    | Serotonergics              | Antagonist          | 5-HT3                         | 0.980 |
| Paliperidone                                  | Neurotransmission          | Antipsychotic       |                               | 0.980 |
| Xylometazoline hydrochloride                  | Adrenoceptor               | Agonist             | alpha                         | 0.980 |
| Baclofen                                      | GABA                       | Agonist             | GABA-B                        | 0.980 |
| Ro 61-8048                                    | Neuroscience               | Inhibitor           | KMO                           | 0.980 |
| CGS-15943                                     | Adenosine                  | Antagonist          | A1                            | 0.980 |
| Auraptene                                     | Cell Signaling             | Modulator/Inhibitor | ACAT                          | 0.980 |
| U-99194A maleate                              | Dopamine                   | Antagonist          | D3                            | 0.979 |
| Zoledronic acid monohydrate                   | Kinase                     | Inhibitor           | FPP synthase                  | 0.979 |
| Decamethonium dibromide                       | Cholinergic                | Agonist             | Nicotinic                     | 0.979 |
| Hydroxylamine hydrochloride                   | Neurotransmission          | Inhibitor           | MAO                           | 0.979 |
| PRE-084                                       | Opioid                     | Agonist             | sigma1                        | 0.978 |
| Acetyl-beta-methylcholine chloride            | Cholinergic                | Agonist             | M1                            | 0.978 |
| Captopril                                     | Neurotransmission          | Inhibitor           | ACE                           | 0.978 |
| Lithium Chloride                              | Neurotransmission          | Inhibitor           | Inositol monophosphatase      | 0.978 |
| Ziprasidone hydrochloride monohydrate         | Neurotransmission          | Antipsychotic       |                               | 0.978 |
| 1,7-Dimethylxanthine                          | Adenosine                  | Antagonist          | A1 > A2                       | 0.978 |
| S(-)-Atenolol                                 | Adrenoceptor               | Antagonist          | beta1                         | 0.978 |
| 1-(2-Methoxyphenyl)piperazine hydrochloride   | Serotonin                  | Agonist             | 5-HT1 > 5-HT2                 | 0.978 |
| SB 222200                                     | Tachykinin                 | Antagonist          | NK3                           | 0.978 |

|                                                                      |                                  |                   |                           |       |
|----------------------------------------------------------------------|----------------------------------|-------------------|---------------------------|-------|
| Adenosine 3',5'-cyclic monophosphate                                 | Phosphorylation                  | Activator         | PKA                       | 0.978 |
| Hexamethonium bromide                                                | Cholinergic                      | Antagonist        | Nicotinic                 | 0.977 |
| Serotonin hydrochloride                                              | Serotonin                        | Agonist           |                           | 0.977 |
| Amlexanox                                                            |                                  |                   |                           | 0.977 |
| Sertaconazole nitrate                                                | Antifungal                       | Inhibitor         | P450                      | 0.977 |
| Thioridazine hydrochloride                                           | Dopamine                         | Antagonist        | D1/D2                     | 0.977 |
| Clemastine fumarate                                                  | Histamine                        | Antagonist        | H1                        | 0.977 |
| Tiapride hydrochloride                                               | Dopamine                         | Antagonist        | D2/D3                     | 0.976 |
| Propafenone hydrochloride                                            | K+ Channel                       | Blocker           | hKv1.5                    | 0.976 |
| Paromomycin sulfate                                                  | Antibiotic                       |                   | Protein synthesis         | 0.976 |
| Remodelin hydrobromide                                               | Gene Regulation                  | Inhibitor         | NAT10                     | 0.976 |
| GSK2578215A                                                          | Phosphorylation                  | Inhibitor         | LRRK2                     | 0.976 |
| Ciproxifan hydrochloride                                             | Histamine                        | Antagonist        | H3                        | 0.976 |
| SR-58611A                                                            | Adrenergics                      | Agonist           | b3                        | 0.976 |
| Dipyridamole                                                         | Adenosine                        | Inhibitor         |                           | 0.976 |
| Mexiletene hydrochloride                                             | Na+ Channel                      | Blocker           |                           | 0.976 |
| Centrophoxine hydrochloride                                          | Nootropic                        |                   |                           | 0.976 |
| Cyclosporin A                                                        | Phosphorylation                  | Inhibitor         | Calcineurin phosphatase   | 0.976 |
| 8-Hydroxy-DPAT hydrobromide                                          | Serotonin                        | Agonist           | 5-HT1A                    | 0.976 |
| Harmaline                                                            | Imidazoline                      | Agonist           | I1                        | 0.975 |
| SKF-525A hydrochloride                                               | Multi-Drug Resistance            | Inhibitor         | Microsomal oxidation      | 0.975 |
| Droperidol                                                           | Dopamine                         | Antagonist        | D1/D2                     | 0.975 |
| Nicosamide                                                           | Antibiotic                       |                   | Protonophore              | 0.975 |
| 8-(3-Chlorostyryl)caffeine                                           | Adenosine                        | Antagonist        | A2A                       | 0.975 |
| Apomorphine hydrochloride hemihydrate                                | Dopamine                         | Agonist           |                           | 0.975 |
| Aurothioglucose                                                      | Phosphorylation                  | Inhibitor         | rac1                      | 0.975 |
| Cephalexin hydrate                                                   | Antibiotic                       |                   | Cell wall synthesis       | 0.975 |
| Entecavir                                                            | Cell Signaling                   | Inhibitor         |                           | 0.975 |
| CCCI-01                                                              | Apoptosis                        | Inducer           |                           | 0.975 |
| Bisoprolol hemifumarate salt                                         | Adrenoceptor                     | Antagonist        | Beta1                     | 0.974 |
| Diphenhydramine hydrochloride                                        | Histamine                        | Antagonist        | H1                        | 0.974 |
| Clodronic acid                                                       | Cytoskeleton and ECM             | Inhibitor         | MMP1 / collagenase        | 0.974 |
| NAN-190 hydrobromide                                                 | Serotonin                        | Antagonist        | 5-HT1A                    | 0.974 |
| Lomequatrib                                                          | Gene Regulation                  | Inhibitor         | MGMT                      | 0.974 |
| Lubuluzole dihydrochloride                                           | Glutamate                        | Antagonist        | NMDA                      | 0.974 |
| Pyridostigmine bromide                                               | Cholinergic                      | Inhibitor         | Cholinesterase            | 0.974 |
| Vancomycin hydrochloride from Streptomyces orientalis                | Antibiotic                       |                   | Cell wall synthesis       | 0.974 |
| Sandoz 58-035                                                        | Lipid                            | Inhibitor         | ACAT                      | 0.974 |
| 2',3'-dideoxycytidine                                                | Immune System                    | Inhibitor         | Reverse Transcriptase     | 0.974 |
| CRANAD 2                                                             | Alzheimer's disease              | fluorescent probe | A <sup>+</sup> plaque     | 0.973 |
| N-Oleoyldopamine                                                     | Neurotransmission                | Ligand            | CB1                       | 0.973 |
| A-315456                                                             | Adrenoceptor                     | Antagonist        | alpha1D                   | 0.973 |
| (-)-trans-(1S,2S)-U-50488 hydrochloride                              | Opioid                           | Agonist           | kappa                     | 0.973 |
| Hispidin                                                             | Phosphorylation                  | Inhibitor         | PKC-beta                  | 0.973 |
| Primidone                                                            | Anticonvulsant                   |                   |                           | 0.973 |
| (+)-Hydrastine                                                       | GABA                             | Antagonist        | GABA-A                    | 0.973 |
| N,N-Dihexyl-2-(4-fluorophenyl)indole-3-acetamide                     | Benzodiazepine                   | Ligand            | Mitochondria              | 0.973 |
| L-Canavanine sulfate                                                 | Nitric Oxide                     | Inhibitor         | iNOS                      | 0.973 |
| Pirfenidone                                                          | Immune System                    | Inhibitor         |                           | 0.972 |
| Alprenolol hydrochloride                                             | Adrenoceptor                     | Antagonist        | beta                      | 0.972 |
| TTNPB                                                                | Transcription                    | Ligand            | RAR-alpha, beta, gamma    | 0.972 |
| Indinavir sulfate salt hydrate                                       | immune cell signaling            | Inhibitor         | HIV                       | 0.972 |
| 2,3-Butanedione monoxide                                             | K+ Channel                       | Blocker           | ATP-sensitive             | 0.972 |
| Arecaidine propargyl ester hydrobromide                              | Cholinergic                      | Agonist           | M2                        | 0.972 |
| Phenserine                                                           | Neurotransmission                | Inhibitor         | Acetylcholinesterase      | 0.972 |
| Clozapine                                                            | Dopamine                         | Antagonist        | D4 > D2, D3               | 0.972 |
| SB-366791                                                            | Vanilloid                        | Antagonist        | VR1                       | 0.972 |
| PD 98,059                                                            | Phosphorylation                  | Inhibitor         | MEK2                      | 0.972 |
| SU 4312                                                              | Phosphorylation                  | Inhibitor         | KDR                       | 0.971 |
| SBI-0087702                                                          | Cell Signaling and Neuroscience  | Inhibitor         | ATF2                      | 0.971 |
| Disopyramide                                                         | Na+ Channel                      | Blocker           |                           | 0.971 |
| 4-Aminobenzamide dihydrochloride                                     | Biochemistry                     | Inhibitor         | Trypsin                   | 0.971 |
| Daphnetin                                                            | Phosphorylation                  | Inhibitor         | PK                        | 0.971 |
| 1-Methylhistamine dihydrochloride                                    | Histamine                        | Metabolite        |                           | 0.971 |
| Fosmidomycin sodium salt hydrate                                     | Arachidonic Acid Cascade         | Inhibitor         | DXR                       | 0.971 |
| CGP 20712A methanesulfonate                                          | Adrenoceptor                     | Antagonist        | beta1                     | 0.971 |
| Methoxamine hydrochloride                                            | Adrenoceptor                     | Agonist           | alpha1                    | 0.970 |
| Atropine methyl bromide                                              | Cholinergic                      | Antagonist        | Muscarinic                | 0.970 |
| L-3,4-Dihydroxyphenylalanine                                         | Dopamine                         | Precursor         |                           | 0.970 |
| 2-methoxyestradiol                                                   | Hormone                          | Metabolite        | Estrogen                  | 0.970 |
| Atglstatin                                                           | Lipids                           | Inhibitor         | ATGL                      | 0.970 |
| Theobromine                                                          | Adenosine                        | Antagonist        | A1 > A2                   | 0.970 |
| ICI 204,448 hydrochloride                                            | Opioid                           | Agonist           | kappa                     | 0.970 |
| ML277                                                                | Ion Channels                     | Activator         | KCNQ1 > KCNQ2, KCNQ4      | 0.970 |
| M-110                                                                | Kinase/Phosphatase               | Inhibitor         | PIM-3                     | 0.969 |
| R(+)-Butylindazole                                                   | Ion Pump                         | Inhibitor         | K+/Cl- transport          | 0.969 |
| Notriptyline hydrochloride                                           | Adrenoceptor                     | Inhibitor         | Uptake                    | 0.969 |
| Leukadherin-1                                                        | Cell Signaling and Neuroscience  | Agonist           | CD11b/CD18                | 0.969 |
| Corticosterone                                                       | Hormone                          |                   | Glucocorticoid            | 0.969 |
| Bromoacetylcholine bromide                                           | Cholinergic                      | Ligand            |                           | 0.969 |
| Lercanidipine hydrochloride hemihydrate                              | Calcium Channel                  | Antagonist        | Cav1.2b                   | 0.969 |
| Atenolol                                                             | Adrenoceptor                     | Antagonist        | beta1                     | 0.969 |
| SKF 38393, N-allyl-, hydrobromide                                    | Dopamine                         | Agonist           | D1                        | 0.969 |
| 4-Hydroxy-3-methoxyphenylacetic acid                                 | Dopamine                         | Metabolite        |                           | 0.968 |
| KT185                                                                | Cell Signaling and Neuroscience  | Agonist           | P2                        | 0.968 |
| Desipramine hydrochloride                                            | Adrenoceptor                     | Inhibitor         | Uptake                    | 0.968 |
| 2-Hydroxysaclofen                                                    | GABA                             | Antagonist        | GABA-B                    | 0.968 |
| Clonidine hydrochloride                                              | Adrenoceptor                     | Agonist           | alpha2                    | 0.968 |
| Venlafaxine hydrochloride                                            | Serotonin                        | Reuptake          | 5-HT and NE               | 0.968 |
| p-Aminoclonidine hydrochloride                                       | Adrenoceptor                     | Agonist           | alpha2                    | 0.967 |
| 4-Imidazolemethanol hydrochloride                                    | Histamine                        | Inhibitor         | Histidin Dehydrogenase    | 0.967 |
| AA-861                                                               | Leukotriene                      | Inhibitor         | 5-lipoxygenase            | 0.967 |
| Tirapazamine                                                         | Apoptosis                        | Inducer           |                           | 0.967 |
| Zaprinas                                                             | Cyclic Nucleotides               | Inhibitor         | PDE V                     | 0.967 |
| Cilnidipine                                                          | Ca2+ Channels                    | Blocker           | L-type                    | 0.966 |
| L-Canavanine                                                         | Cell Stress                      | Inhibitor         | iNOS                      | 0.966 |
| threo-1-Phenyl-2-decanoilamino-3-morpholino-1-propanol hydrochloride | Sphingolipid                     | Inhibitor         | Glucosylceramide synthase | 0.966 |
| Apigenin                                                             | Cell Cycle                       | Inhibitor         |                           | 0.966 |
| Azelaic acid                                                         | DNA Metabolism                   | Inhibitor         |                           | 0.966 |
| Fusaric acid                                                         | Dopamine                         | Inhibitor         | Dopamine beta-hydroxylase | 0.966 |
| Dihydrokainic acid                                                   | Glutamate                        | Blocker           | Kainate                   | 0.966 |
| Histamine dihydrochloride                                            | Histamine                        | Agonist           |                           | 0.966 |
| 1,4-Dideoxy-1,4-imino-D-arabinitol                                   | Phosphorylation                  | Inhibitor         | Glycogen phosphorylase    | 0.966 |
| PF-429242 dihydrochloride                                            | Gene Regulation                  | Inhibitor         | S1P                       | 0.966 |
| K114                                                                 | Neurotransmission                | Amyloid probe     |                           | 0.966 |
| Benzamide hydrochloride                                              | Biochemistry                     | Inhibitor         | Peptidase                 | 0.965 |
| Tamoxifen citrate                                                    | Phosphorylation                  | Inhibitor         | PKC                       | 0.965 |
| Lumefantrine                                                         | Immunomodulators and Antibiotics |                   |                           | 0.965 |
| Naltrexone hydrochloride                                             | Opioid                           | Antagonist        |                           | 0.965 |
| 1,3-Dipropyl-8-p-sulfophenylxanthine                                 | Adenosine                        | Antagonist        | A1 > A2                   | 0.965 |
| Phenelzine sulfate                                                   | Neurotransmission                | Inhibitor         | MAO-A/B                   | 0.965 |
| Hydroxyurea                                                          | DNA Metabolism                   | Inhibitor         | Ribonucleoside reductase  | 0.965 |
| Taxifolin                                                            | Cell Stress                      | Inhibitor         | Antioxidant               | 0.965 |
| Ebastine                                                             | Histaminergics                   | Antagonist        | H1                        | 0.965 |
| DM 235                                                               | Nootropic                        |                   |                           | 0.965 |
| Cisplatin                                                            | DNA                              | Intercalator      |                           | 0.965 |
| 2-Chloroadenosine triphosphate tetrasodium                           | P2 Receptor                      | Agonist           | P2Y                       | 0.965 |

|                                                                        |                       |                  |                                 |       |
|------------------------------------------------------------------------|-----------------------|------------------|---------------------------------|-------|
| ML324                                                                  | Gene Regulation       | Inhibitor        | JMJD2                           | 0.964 |
| Octopamine hydrochloride                                               | Adrenoceptor          | Agonist          | alpha                           | 0.964 |
| Nordihydroguaiaretic acid from Larrea divaricata (creosote bush)       | Leukotriene           | Inhibitor        | Lipoxygenase                    | 0.964 |
| Teriflunomide                                                          | Immune Signaling      | Inhibitor        | dihydroorotate dehydrogenase    | 0.964 |
| PPADS                                                                  | P2 Receptor           | Antagonist       | P2                              | 0.964 |
| NNGH                                                                   | Extracellular Matrix  | Inhibitor        | MMP-3                           | 0.964 |
| MNS                                                                    | Phosphorylation       | Inhibitor        | Src/Syk                         | 0.964 |
| 3-Aminopropionitrile fumarate                                          | Multi-Drug Resistance | Substrate        | CYP450                          | 0.964 |
| Urapidil, 5-Methyl-                                                    | Adrenoceptor          | Antagonist       | alpha1A                         | 0.964 |
| Varespladib                                                            | Lipids                | Inhibitor        | sPLA2                           | 0.964 |
| Candesartan cilexetil                                                  | Cell Signaling        | Antagonist       |                                 | 0.963 |
| Argatroban monohydrate                                                 | Cell signaling        | Inhibitor        | Thrombin                        | 0.963 |
| N,N,N',N'-Tetramethylazodicarboxamide                                  | Cell Stress           | Modulator        | Thiols                          | 0.963 |
| 1-Aminobenzotriazole                                                   | Multi-Drug Resistance | Inhibitor        | CYP450, chloroperoxidase        | 0.963 |
| Clostimamide                                                           | Cyclic Nucleotides    | Inhibitor        | PDE III                         | 0.963 |
| Prochlorperazine dimaleate                                             | Dopamine              | Antagonist       |                                 | 0.963 |
| 7-Cyclopentyl-5-(4-phenoxy)phenyl-7H-pyrrolo[2,3-d]pyrimidin-4-ylamine | Phosphorylation       | Inhibitor        | Ick                             | 0.963 |
| Normetanephrine hydrochloride                                          | Adrenoceptor          | Metabolite       | Norepinephrine                  | 0.963 |
| p-Fluoro-L-phenylalanine                                               | Neurotransmission     | Substrate        | Tyrosine Hydroxylase            | 0.962 |
| Chelidamic acid                                                        | Glutamate             | Inhibitor        | L-glutamic decarboxylase        | 0.962 |
| SR 59230A oxalate                                                      | Adrenoceptor          | Antagonist       | beta3                           | 0.962 |
| Tyrphostin AG 879                                                      | Phosphorylation       | Inhibitor        | TrkA                            | 0.962 |
| (-)-Scopolamine methyl bromide                                         | Cholinergic           | Antagonist       | Muscarinic                      | 0.962 |
| 4-Hydroxybenzhydrazide                                                 | Biochemistry          | Inhibitor        |                                 | 0.962 |
| Protoporphyrin IX disodium                                             | Cyclic Nucleotides    | Activator        | Guanylyl cyclase                | 0.962 |
| Fluphenazine dihydrochloride                                           | Dopamine              | Antagonist       | D1/D2                           | 0.962 |
| L-azetidine-2-carboxylic acid                                          | Biochemistry          | Inhibitor        | Collagen                        | 0.962 |
| Histamine, R(-)-alpha-methyl-, dihydrochloride                         | Histamine             | Agonist          | H3                              | 0.962 |
| Mitiglinide calcium                                                    | Ion channels          | Antagonist       | KATP                            | 0.961 |
| Benztropine mesylate                                                   | Cholinergic           | Antagonist       | Muscarinic                      | 0.961 |
| SIB 1893                                                               | Glutamate             | Antagonist       | mGluR5                          | 0.961 |
| P1,P4-Di(adenosine-5')tetraphosphate triammonium                       | Biochemistry          | Inhibitor        |                                 | 0.961 |
| AMG 9810                                                               | Ion Channels          | Antagonist       | TRPV1                           | 0.961 |
| Metergoline                                                            | Serotonin             | Antagonist       | 5-HT2/5-HT1D                    | 0.961 |
| cis-4-Aminocrotonic acid                                               | GABA                  | Agonist          | GABA-C                          | 0.961 |
| Danshensu sodium salt                                                  | Cell Stress           | Cardioprotectant |                                 | 0.961 |
| Ofloxacin                                                              | Antibiotic            |                  | DNA Synthesis                   | 0.961 |
| L-Buthionine-sulfoximine                                               | Multi-Drug Resistance | Inhibitor        |                                 | 0.961 |
| Opipramol dihydrochloride                                              | Sigma receptor        | Agonist          | 1, 2                            | 0.961 |
| Dihydroouabain                                                         | Ion Pump              | Inhibitor        | Na+/K+ Pump                     | 0.961 |
| Progulimide                                                            | Cholecystokinin       | Antagonist       |                                 | 0.960 |
| Methiohepin mesylate                                                   | Serotonin             | Antagonist       | 5-HT1E, 5-HT1F, 5-HT6           | 0.960 |
| Amitriptyline hydrochloride                                            | Adrenoceptor          | Inhibitor        | Uptake                          | 0.960 |
| Psoralidin                                                             | Apoptosis             | Inhibitor        | PTP1B                           | 0.960 |
| cis-(Z)-Flupenthixol dihydrochloride                                   | Dopamine              | Antagonist       |                                 | 0.960 |
| Metolazone                                                             | Na+ Channel           | Inhibitor        | Na+/Cl- cotransporter           | 0.960 |
| Dihydroergotamine methanesulfonate                                     | Serotonin             | Antagonist       |                                 | 0.960 |
| 1-Amino-1-cyclohexanecarboxylic acid hydrochloride                     | Neurotransmission     | Substrate        |                                 | 0.960 |
| (S)-MAP4 hydrochloride                                                 | Glutamate             | Antagonist       | mGluR4,6,7                      | 0.959 |
| Cinoxacin                                                              | Antibiotic            | Inhibitor        |                                 | 0.959 |
| 3-Amino-1-propanesulfonic acid sodium                                  | GABA                  | Agonist          | GABA-A                          | 0.959 |
| 4-(2-Aminoethyl)benzenesulfonyl fluoride hydrochloride                 | Biochemistry          | Inhibitor        | Serine Protease                 | 0.959 |
| 2-(2-Aminoethyl)isothioureia dihydrobromide                            | Nitric Oxide          | Inhibitor        | NOS                             | 0.959 |
| Ketanserin tartrate                                                    | Serotonin             | Antagonist       | 5-HT2                           | 0.959 |
| Emodin                                                                 | Phosphorylation       | Inhibitor        | p56lck TK                       | 0.959 |
| GR-89696 fumarate                                                      | Opioid                | Agonist          | kappa                           | 0.959 |
| Chlorzoxazone                                                          | Nitric Oxide          | Inhibitor        | iNOS                            | 0.958 |
| Imazodan                                                               | Cyclic Nucleotides    | Inhibitor        | PDE II                          | 0.958 |
| (+)-Catechin Hydrate                                                   | Cell Stress           | Inhibitor        | Antioxidant                     | 0.958 |
| Enclomiphene hydrochloride                                             | Cytokines             | Antagonist       |                                 | 0.958 |
| U-73343                                                                | G-protein             |                  | PLC                             | 0.958 |
| S(+)-Ibuprofen                                                         | Prostaglandin         | Inhibitor        | COX                             | 0.958 |
| DCEBIO                                                                 | K+ Channel            | Activator        | hK1                             | 0.958 |
| Cephadrine                                                             | Antibiotic            |                  | Cell wall synthesis             | 0.958 |
| Daidzein                                                               | Cell Cycle            | Inhibitor        | Aldehyde dehydrogenase          | 0.958 |
| Aurintricarboxylic acid                                                | Apoptosis             | Inhibitor        | TopoII                          | 0.958 |
| Flutamide                                                              | Hormone               | Inhibitor        | Androgen                        | 0.958 |
| NG-Nitro-L-arginine methyl ester hydrochloride                         | Nitric Oxide          | Inhibitor        | NOS                             | 0.958 |
| Suramin sodium salt                                                    | P2 Receptor           | Antagonist       | P2X, P2Y                        | 0.958 |
| 3-Iodo-L-tyrosine                                                      | Neurotransmission     | Inhibitor        | Tyrosine hydroxylase            | 0.958 |
| 2-Chloro-2-deoxy-D-glucose                                             | Biochemistry          | Analog           | Glucose                         | 0.958 |
| Trazodone hydrochloride                                                | Serotonin             | Inhibitor        | Reuptake                        | 0.958 |
| KU-55933                                                               | Kinase/Phosphatase    | Inhibitor        | (A-T) mutated (ATM) kinase      | 0.957 |
| McN-A-343                                                              | Cholinergic           | Agonist          | M1                              | 0.957 |
| Nitisinone                                                             | Cell Stress           | Inhibitor        | 4-Hydroxyphenylpyruvate oxidase | 0.957 |
| Oxiracetam                                                             | Nootropic             |                  |                                 | 0.957 |
| (+)-Butaclamol hydrochloride                                           | Dopamine              | Antagonist       |                                 | 0.957 |
| 5,5-Diphenylhydantoin                                                  | Anticonvulsant        |                  |                                 | 0.957 |
| GSK-650394                                                             | Cell signaling        | Antagonist       | SGK1                            | 0.956 |
| Meloxicam sodium                                                       | Prostaglandin         | Inhibitor        | COX-2                           | 0.956 |
| Methysergide maleate                                                   | Serotonin             | Antagonist       |                                 | 0.956 |
| 5-Fluorindole-2-carboxylic acid                                        | Glutamate             | Antagonist       | NMDA-Glycine                    | 0.956 |
| Zofenopril calcium                                                     | Angiotensin           | Inhibitor        | ACE                             | 0.955 |
| Quazone                                                                | Cyclic Nucleotides    | Inhibitor        | PDE III                         | 0.955 |
| Calmidazolium chloride                                                 | Intracellular Calcium | Inhibitor        | Ca2+ATPase                      | 0.955 |
| L-Dopa ethyl ester                                                     | Dopaminergics         |                  |                                 | 0.955 |
| Clofazolin                                                             | Cyclic Nucleotides    | Inhibitor        | PDE III                         | 0.955 |
| Quinine sulfate                                                        | K+ Channel            | Antagonist       |                                 | 0.955 |
| Pramipexole dihydrochloride                                            | Dopaminergics         | Agonist          | D3/D2                           | 0.955 |
| GSK1838705A                                                            | Tyrosine Kinase       | Inhibitor        | IGF-IR, IR ALK                  | 0.954 |
| Imetit dihydrobromide                                                  | Histamine             | Agonist          | H3                              | 0.954 |
| Imiloxan hydrochloride                                                 | Adrenoceptor          | Antagonist       | alpha2B                         | 0.954 |
| ABT-418 hydrochloride                                                  | Cholinergic           | Agonist          | nicotinic                       | 0.954 |
| Gabapentin                                                             | Anticonvulsant        |                  |                                 | 0.954 |
| Milrinone                                                              | Cyclic Nucleotides    | Inhibitor        | PDE III                         | 0.954 |
| Fenofibrate                                                            | Transcription         | Agonist          | PPAR-alpha                      | 0.953 |
| Sulindac sulfone                                                       | Prostaglandin         | Inhibitor        |                                 | 0.953 |
| DL-alpha-Difluoromethylornithine hydrochloride                         | Angiogenesis          | Inhibitor        | ODC                             | 0.953 |
| Pyridostatin trifluoroacetate salt                                     | Gene Regulation       | Stabilizer       | G-quadruplex                    | 0.953 |
| Hydralazine hydrochloride                                              | Neurotransmission     | Inhibitor        | MAO-A/B                         | 0.953 |
| Fluoxetine hydrochloride                                               | Serotonin             | Inhibitor        | Reuptake                        | 0.953 |
| Isonipetric acid                                                       | GABA                  | Agonist          | GABA-A                          | 0.953 |
| 1,3-Dipropyl-7-methylxanthine                                          | Adenosine             | Antagonist       | A2                              | 0.952 |
| S(-)-Pindolol                                                          | Adrenergic            | Antagonist       | beta                            | 0.952 |
| Carvedilol                                                             | Adrenoceptor          | Blocker          | alpha1/beta                     | 0.952 |
| 1-Aminocyclopropanecarboxylic acid hydrochloride                       | Glutamate             | Agonist          | NMDA-Glycine                    | 0.952 |
| UCL 2077                                                               | Ion Channels          | Blocker          | sAHP                            | 0.952 |
| 2,2'-Bipyridyl                                                         | Biochemistry          | Inhibitor        | Metalloprotease                 | 0.952 |
| Brompheniramine maleate                                                | Histamine             | Antagonist       | H1                              | 0.952 |
| Cibenzoline succinate                                                  | K+ Channels           | Blocker          | ATP-sensitive                   | 0.952 |
| Perphenazine                                                           | Dopamine              | Antagonist       | D2                              | 0.952 |
| Dopamine hydrochloride                                                 | Dopamine              | Agonist          |                                 | 0.951 |
| Indatraline hydrochloride                                              | Dopamine              | Inhibitor        | Reuptake                        | 0.951 |
| 1-Deoxyynjirimycin hydrochloride                                       | Biochemistry          | Inhibitor        | alpha-glucosidase               | 0.951 |
| Atropine sulfate                                                       | Cholinergic           | Antagonist       | Muscarinic                      | 0.951 |
| L-Cysteinesulfonic Acid                                                | Glutamate             | Ligand           |                                 | 0.951 |
| 3-Morpholinolysynonimine hydrochloride                                 | Nitric Oxide          | Donor            |                                 | 0.950 |

|                                                                |                                  |                 |                                 |       |
|----------------------------------------------------------------|----------------------------------|-----------------|---------------------------------|-------|
| PMEG hydrate                                                   | Apoptosis and Cell Cycle         | Inhibitor       | DNA polymerase                  | 0.950 |
| Norepinephrine (+)bitartrate                                   | Adrenoceptor                     | Agonist         |                                 | 0.950 |
| CCG-50014                                                      | Cell Signaling and Neuroscience  | Inhibitor       | RGS4 and RGS8                   | 0.950 |
| Adaphostin                                                     | Tyrosine kinase                  | Inhibitor       | p210bcrr/abl                    | 0.950 |
| Parthenolide                                                   | Serotonin                        | Inhibitor       |                                 | 0.950 |
| Atreleuton                                                     | Cell Signaling                   | Inhibitor       | 5-lipoxygenase                  | 0.949 |
| Chlorpheniramine maleate                                       | Histamine                        | Antagonist      | H1                              | 0.949 |
| Loxiglumide                                                    | Cholinergics                     | Antagonist      | CCKA                            | 0.949 |
| 1,3,5-tris(4-hydroxyphenyl)-4-propyl-1H-pyrazole               | Hormone                          | Agonist         | ER-alpha                        | 0.949 |
| Nialamide                                                      | Neurotransmission                | Inhibitor       | MAO                             | 0.949 |
| HA155                                                          | Cell Signaling and Neuroscience  | Inhibitor       | autotaxin                       | 0.949 |
| DL-2-Amino-3-phosphonopropionic acid                           | Glutamate                        | Antagonist      | NMDA                            | 0.949 |
| U-101956 maleate                                               | Dopamine                         | Antagonist      | D4                              | 0.949 |
| Haloperidol                                                    | Dopamine                         | Antagonist      | D2/D1                           | 0.949 |
| S-Nitroso-N-acetylpenicillamine                                | Nitric Oxide                     | Donor           |                                 | 0.949 |
| 1,1-Dimethyl-4-phenyl-piperazinium iodide                      | Cholinergic                      | Agonist         |                                 | 0.949 |
| (E)-4-amino-2-butenic acid                                     | GABA                             | Agonist         | GABA-C                          | 0.949 |
| Iofetamine hydrochloride                                       | Neurotransmission                |                 |                                 | 0.949 |
| MCC-555                                                        | Cell signaling and neuroscience  | Inhibitor       |                                 | 0.948 |
| 3-MFA                                                          | Ion Channels                     | Blocker         | TRPM2                           | 0.948 |
| Agmatine sulfate                                               | Imidazoline                      | Agonist         |                                 | 0.948 |
| SANT-1                                                         | Angiogenesis                     | Inhibitor       | Smo                             | 0.948 |
| Gardiquimod                                                    | Immune Signaling                 | Agonist         | TLR7/TLR8                       | 0.948 |
| Chlormethiazole hydrochloride                                  | GABA                             | Agonist         | GABA(A)                         | 0.948 |
| CGP-12177A hydrochloride                                       | Adrenoceptor                     | Agonist         | beta                            | 0.948 |
| Aniracetam                                                     | Glutamate                        | Agonist         | AMPA                            | 0.947 |
| Triamterene                                                    | Na+ Channel                      | Blocker         |                                 | 0.947 |
| 8-(p-Sulfophenyl)theophylline                                  | Adenosine                        | Antagonist      | A1 > A2                         | 0.947 |
| NSC 617145                                                     | Gene Regulation                  | Inhibitor       | WRN                             | 0.947 |
| TIC10 angular                                                  | Gene Regulation                  | Antagonist      | Akt and ERK                     | 0.947 |
| Cyproterone acetate                                            | Hormone                          | Antagonist      | Androgen                        | 0.947 |
| Amoxapine                                                      | Adrenoceptor                     | Inhibitor       | Uptake                          | 0.946 |
| AIDA                                                           | Glutamate                        | Antagonist      | mGluR1                          | 0.946 |
| Fulvestrant                                                    | Hormone                          | SERD            | Estrogen Receptor               | 0.946 |
| alpha-Lobeline hydrochloride                                   | Cholinergic                      | Agonist         | Nicotinic                       | 0.946 |
| Trimethoprim                                                   | Antibiotic                       | Inhibitor       | Dihydrofolate reductase         | 0.946 |
| Nepicastat hydrochloride                                       | Dopamine                         | Inhibitor       | dopamine +hydroxylase           | 0.946 |
| ONO-RS-082                                                     | Lipids                           | Inhibitor       | phospholipase A2                | 0.946 |
| 5-azacytidine                                                  | DNA Metabolism                   | Inhibitor       | DNA methyltransferase           | 0.946 |
| Benazoline oxalate                                             | Imidazoline                      | Agonist         | i2                              | 0.946 |
| MHPG piperazine                                                | Adrenoceptor                     | Metaboliite     |                                 | 0.946 |
| D-Cycloserine                                                  | Glutamate                        | Agonist         | NMDA-Glycine                    | 0.946 |
| MG 624                                                         | Cholinergic                      | Antagonist      | Nicotinic                       | 0.945 |
| Rofecoxib                                                      | Lipid Signaling                  | Inhibitor       | COX-2                           | 0.945 |
| Bestatin hydrochloride                                         | Biochemistry                     | Inhibitor       | Aminopeptidase                  | 0.945 |
| NADPH tetrasodium                                              | Nitric Oxide                     | Cofactor        |                                 | 0.945 |
| Alfuzosin hydrochloride                                        | Adrenoceptor                     | Blocker         |                                 | 0.945 |
| alpha-Methyl-DL-tyrosine methyl ester hydrochloride            | Neurotransmission                | Inhibitor       | Tyrosine hydroxylase            | 0.945 |
| Pargyline hydrochloride                                        | Neurotransmission                | Inhibitor       | MAO-B                           | 0.944 |
| Cefmetazole sodium                                             | Antibiotic                       |                 | Cell wall synthesis             | 0.944 |
| L-Glutamic acid, N-phthaloyl-                                  | Glutamate                        | Agonist         | NMDA                            | 0.944 |
| CGS-12066A maleate                                             | Serotonin                        | Agonist         | 5-HT1B                          | 0.944 |
| Acyclovir                                                      | Immune System                    | Inhibitor       | Viral DNA synthesis             | 0.944 |
| p-Iodoclonidine hydrochloride                                  | Adrenoceptor                     | Agonist         | alpha2                          | 0.944 |
| Pinacidil                                                      | K+ Channel                       | Activator       |                                 | 0.944 |
| Paroxetine hydrochloride hemihydrate (MW = 374.83)             | Serotonin                        | Inhibitor       | Reuptake                        | 0.943 |
| Ipratropium bromide                                            | Cholinergic                      | Antagonist      | Muscarinic                      | 0.943 |
| 6-Hydroxy-DL-DOPA                                              | Adrenoceptor                     | Neurotoxin      |                                 | 0.943 |
| 1-(5-Isouquinolinesulfonyl)-2-methylpiperazine dihydrochloride | Phosphorylation                  | Inhibitor       | PKA / PKC                       | 0.943 |
| NNC 55-0396                                                    | Ca2+ Channel                     | Inhibitor       | T-type                          | 0.943 |
| Lomefloxacin hydrochloride                                     | Antibiotic                       | Inhibitor       | DNA Gyrase                      | 0.943 |
| Salirasib                                                      | Cell signaling and Neuroscience  | Inhibitor       | RAS                             | 0.943 |
| Trovaloxacin mesylate                                          | Immunomodulators and Antibiotics | Inhibitor       | DNA gyrase and topoisomerase IV | 0.943 |
| Bay K 8644                                                     | Ca2+ Channel                     | Agonist         | L-type                          | 0.942 |
| Fiduxosin hydrochloride                                        | Adrenoceptor                     | Antagonist      | alpha1                          | 0.942 |
| CPNQ                                                           | Neurotransmission                | Neuroprotectant |                                 | 0.942 |
| R-(+)-8-Hydroxy-DPAT hydrobromide                              | Serotonin                        | Agonist         | 5-HT1A                          | 0.942 |
| (S)-(+)-Camptothecin                                           | Apoptosis                        | Inhibitor       | Topol                           | 0.942 |
| MK-677                                                         | Cytokines                        | Agonist         | ghrelin                         | 0.942 |
| Hemicholinium-3                                                | Cholinergic                      | Blocker         | Uptake                          | 0.942 |
| Flunarizine dihydrochloride                                    | Ion Pump                         | Blocker         | Na+/Ca2+ channel                | 0.942 |
| BMV 7378 dihydrochloride                                       | Serotonin                        | Agonist         | 5-HT1A                          | 0.941 |
| Tizanidine hydrochloride                                       | Adrenoceptor                     | Agonist         | alpha2                          | 0.941 |
| AS-252424                                                      | Phosphorylation                  | Inhibitor       | P13Kgamma                       | 0.941 |
| (+)-Cyclazocine                                                | Opioid                           | Antagonist      |                                 | 0.941 |
| gamma-Acetylinic GABA                                          | GABA                             | Inhibitor       | GABA transaminase               | 0.941 |
| 8-Methoxymethyl-3-isobutyl-1-methylxanthine                    | Cyclic Nucleotides               | Inhibitor       | PDE 1                           | 0.941 |
| Cinnarizine                                                    | Ca2+ Channel                     | Blocker         |                                 | 0.941 |
| Noscaphine hydrochloride                                       | Opioid                           | Ligand          |                                 | 0.941 |
| R-(+)-7-Hydroxy-DPAT hydrobromide                              | Dopamine                         | Agonist         | D3                              | 0.940 |
| Idazoxan hydrochloride                                         | Imidazoline                      | Ligand          | I1 / I2                         | 0.940 |
| N-omega-Methyl-5-hydroxytryptamine oxalate salt                | Serotonin                        | Ligand          |                                 | 0.940 |
| Nipecotic acid                                                 | GABA                             | Inhibitor       | Uptake                          | 0.940 |
| GW7647                                                         | Transcription                    | Agonist         | PPAR-alpha                      | 0.940 |
| N6-Cyclohexyladenosine                                         | Adenosine                        | Agonist         | A1                              | 0.940 |
| 13-cis-retinoic acid                                           | Transcription                    | Regulator       | RAR-alpha, beta                 | 0.940 |
| Sematilide monohydrochloride monohydrate                       | K+ Channel Modulator             | Blocker         | Kir                             | 0.940 |
| loxoprofen                                                     | Prostaglandin                    | Inhibitor       | COX                             | 0.940 |
| Pimozide                                                       | Dopamine                         | Antagonist      | D2                              | 0.940 |
| Oxaprozin                                                      | Prostaglandin                    | Inhibitor       |                                 | 0.940 |
| Buspirone hydrochloride                                        | Serotonin                        | Agonist         | 5-HT1A                          | 0.940 |
| Tranilast                                                      | Leukotriene                      | Inhibitor       | LTC4                            | 0.940 |
| Lamotrigine                                                    | Anticonvulsant                   |                 |                                 | 0.939 |
| 6,7-ADTN hydrobromide                                          | Dopamine                         | Agonist         |                                 | 0.939 |
| Chlorpromazine hydrochloride                                   | Dopamine                         | Antagonist      |                                 | 0.939 |
| Clemizole hydrochloride                                        | Histamine                        | Antagonist      | H1                              | 0.939 |
| AGK2                                                           | Gene Regulation                  | Inhibitor       | SIRT2                           | 0.939 |
| Oleic Acid                                                     | Phosphorylation                  | Activator       | PKC                             | 0.939 |
| Zonisamide sodium                                              | Anticonvulsant                   |                 |                                 | 0.939 |
| IB-MECA                                                        | Adenosine                        | Agonist         | A3                              | 0.939 |
| Isoxanthopterin                                                | Cell Stress                      | Metabolite      |                                 | 0.939 |
| Naratriptan hydrochloride                                      | Serotonin                        | Agonist         | 5-HT1B/1D                       | 0.939 |
| ML-7                                                           | Phosphorylation                  | Inhibitor       | MLCK                            | 0.939 |
| Mibefradil dihydrochloride                                     | Ca2+ Channel                     | Blocker         | T-type                          | 0.938 |
| PK 11195                                                       | GABA                             | Antagonist      | Benzodiazepine                  | 0.938 |
| Doxepin hydrochloride                                          | Adrenoceptor                     | Inhibitor       | Uptake                          | 0.938 |
| SANT-2                                                         | Gene Regulation                  | Inhibitor       | SMO                             | 0.938 |
| GSK137647A                                                     | Lipids                           | Agonist         | FFA4/GPR120                     | 0.938 |
| BIO                                                            | Phosphorylation                  | Inhibitor       | GSK-3alpha/beta                 | 0.938 |
| R(+)-JAA-94                                                    | Cl- Channel                      | Inhibitor       |                                 | 0.938 |
| S15535                                                         | Serotonin                        | Agonist         | 5-HT1A                          | 0.938 |
| Oxotremorine methiodide                                        | Cholinergic                      | Agonist         | Muscarinic                      | 0.938 |
| 5,7-Dichlorokynurenic acid                                     | Glutamate                        | Antagonist      | NMDA-glycine                    | 0.938 |
| CX 546                                                         | Glutamate                        | Modulator       | AMPA                            | 0.938 |
| Pentoxifylline                                                 | Cyclic Nucleotides               | Inhibitor       | PDE                             | 0.938 |
| Naltrindole hydrochloride                                      | Opioid                           | Antagonist      | delta                           | 0.938 |
| L-Tryptophan                                                   | Serotonin                        | Precursor       |                                 | 0.938 |



|                                                                         |                                 |                     |                                         |       |
|-------------------------------------------------------------------------|---------------------------------|---------------------|-----------------------------------------|-------|
| Atropine methyl nitrate                                                 | Cholinergic                     | Antagonist          | Muscarinic                              | 0.937 |
| LY-310,762 hydrochloride                                                | Serotonin                       | Antagonist          | 5-HT1D                                  | 0.937 |
| Rabeprazole sodium                                                      | Ion Channels                    | Inhibitor           | Proton pump                             | 0.937 |
| Nicardipine hydrochloride                                               | Ca2+ Channel                    | Antagonist          | L-type                                  | 0.937 |
| 2-Cyclooctyl-2-hydroxyethylamine hydrochloride                          | Neurotransmission               | Inhibitor           | PNMT                                    | 0.937 |
| Dolasetron mesylate hydrate                                             | Serotonergic                    | Antagonist          | 5-HT3                                   | 0.936 |
| PAPP                                                                    | Serotonin                       | Agonist             | 5-HT1A                                  | 0.936 |
| Eprosartan mesylate                                                     | Angiotensins                    | Antagonist          | AT 1                                    | 0.936 |
| 3-(1H-Imidazol-4-yl)propyl di(p-fluorophenyl)methyl ether hydrochloride | Histamine                       | Antagonist          | H3                                      | 0.936 |
| ZD 7114 hydrochloride                                                   | Adrenergics                     | Agonist             | Beta-three                              | 0.935 |
| 3-Isobutyl-1-methylxanthine                                             | Adenosine                       | Inhibitor           | Phosphodiesterase                       | 0.935 |
| Darunavir                                                               | Protease                        | Inhibitor           | HIV protease                            | 0.935 |
| Ropinrole hydrochloride                                                 | Dopamine                        | Agonist             | D3                                      | 0.935 |
| Putrescine dihydrochloride                                              | Glutamate                       | Agonist             | NMDA-Polyamine                          | 0.935 |
| (-)-cis-(1S,2R)-U-50488 tartrate                                        | Neurotransmission               | Ligand              | Sigma receptor                          | 0.934 |
| L-3,4-Dihydroxyphenylalanine methyl ester hydrochloride                 | Dopamine                        | Precursor           |                                         | 0.934 |
| Aminoguanidine hydrochloride                                            | Nitric Oxide                    | Inhibitor           | NOS                                     | 0.934 |
| Caffeic Acid                                                            | Cell Stress                     | Inhibitor           | Antioxidant                             | 0.934 |
| N-Methyl-1-deoxyojirrimycin                                             | Biochemistry                    | Inhibitor           | Glucosidase                             | 0.934 |
| L-745,870 hydrochloride                                                 | Dopamine                        | Antagonist          | D4                                      | 0.934 |
| Norcatharidin                                                           | Phosphorylation                 | Inhibitor           | PP2A                                    | 0.934 |
| Kainic acid                                                             | Glutamate                       | Agonist             | Kainate                                 | 0.934 |
| Olprinone hydrochloride                                                 | Phosphodiesterase               | Inhibitor           | PDE3                                    | 0.934 |
| 4-Aminopyridine                                                         | K+ Channel                      | Blocker             | A-type                                  | 0.934 |
| Icaritin                                                                | PPAR                            | Modulator           |                                         | 0.933 |
| Clorgyline hydrochloride                                                | Neurotransmission               | Inhibitor           | MAO-A                                   | 0.933 |
| Ibudilast                                                               | Cyclic Nucleotides              | Inhibitor           | PDE IV                                  | 0.933 |
| Molindone hydrochloride                                                 | Dopamine                        | Antagonist          | D2                                      | 0.933 |
| Muscarine chloride                                                      | Cholinergic                     | Agonist             | Muscarinic                              | 0.933 |
| Loxapine succinate                                                      | Dopamine                        | Antagonist          |                                         | 0.933 |
| Metolazone                                                              | Ion Pump                        | Inhibitor           | Na+/Cl- transporter                     | 0.933 |
| GR 127935 hydrochloride hydrate                                         | Serotonin                       | Antagonist          | 5-HT1B/1D                               | 0.933 |
| Pindolol                                                                | Adrenoceptor                    | Antagonist          | beta                                    | 0.932 |
| Cysteamine hydrochloride                                                | Somatostatin                    | Deleter             |                                         | 0.932 |
| Ketotifen fumarate                                                      | Histamine                       | Antagonist          | H1                                      | 0.932 |
| Clonixin                                                                | Inflammation                    | Inhibitor           |                                         | 0.932 |
| Benztropine mesylate                                                    | Cell Signaling and Neuroscience | Antagonist          | muscarinic acetylcholine receptor / DAT | 0.932 |
| Lidocaine N-ethyl bromide quaternary salt                               | Na+ Channel                     | Antagonist          |                                         | 0.932 |
| Metoprolol (+)-tartrate                                                 | Adrenoceptor                    | Antagonist          | beta1                                   | 0.931 |
| Betaine aldehyde chloride                                               | Cholinergic                     | Metabolite          | Choline dehydrogenase                   | 0.931 |
| (-)-Tetramisole hydrochloride                                           | Phosphorylation                 | Inhibitor           |                                         | 0.931 |
| MRS 1523                                                                | Adenosine                       | Antagonist          | A3                                      | 0.931 |
| Cambinol                                                                | Gene Regulation                 | Inhibitor           | SIRT1/2                                 | 0.931 |
| NG-Monomethyl-L-arginine acetate                                        | Nitric Oxide                    | Inhibitor           | NOS                                     | 0.931 |
| Piroxicam                                                               | Prostaglandin                   | Inhibitor           | COX                                     | 0.931 |
| Actinonin                                                               | Biochemistry                    | Inhibitor           | Leucine aminopeptidase                  | 0.931 |
| TMB-8 hydrochloride                                                     | Intracellular Calcium           | Antagonist          |                                         | 0.930 |
| Retro-2                                                                 | Cell Signaling and Neuroscience | Inhibitor           |                                         | 0.930 |
| Amiloride hydrochloride                                                 | Na+ Channel                     | Blocker             | Epithelial                              | 0.930 |
| (±)-2-Amino-4-phosphonobutyric acid                                     | Glutamate                       | Antagonist          | NMDA                                    | 0.930 |
| 2',3'-didehydro-3'-deoxythymidine                                       | Immune System                   | Inhibitor           | Reverse Transcriptase                   | 0.929 |
| Metoclopramide hydrochloride                                            | Dopamine                        | Antagonist          | D2                                      | 0.929 |
| Niflumic acid                                                           | Prostaglandin                   | Inhibitor           | COX-2                                   | 0.929 |
| SR-95531                                                                | GABA                            | Antagonist          | GABA-A                                  | 0.929 |
| 4-Amidinophenylmethanesulfonyl fluoride hydrochloride                   | Biochemistry                    | Inhibitor           | Serine protease                         | 0.929 |
| 1,10-Diaminodecane                                                      | Glutamate                       | Agonist (inverse)   | NMDA-polyamine                          | 0.929 |
| HI-TOPK-032                                                             | Kinase inhibitors               | Inhibitor           | TPOK                                    | 0.929 |
| Ethosuximide                                                            | Anticonvulsant                  |                     |                                         | 0.929 |
| Ketoprofen                                                              | Prostaglandin                   | Inhibitor           | COX-1                                   | 0.928 |
| PNU-282987                                                              | Cholinergic                     | Agonist             | Nicotinic alpha7                        | 0.928 |
| Ara-G hydrate                                                           | Apoptosis                       | inducer             |                                         | 0.928 |
| Isoguvacine hydrochloride                                               | GABA                            | Agonist             | GABA(A)                                 | 0.928 |
| Cetirizine dihydrochloride                                              | Histamine                       | Antagonist          | H1                                      | 0.927 |
| DBO-83                                                                  | Cholinergic                     | Agonist             | Nicotinic                               | 0.927 |
| 6-Nitroso-1,2-benzopyrone                                               | Gene Regulation                 | Inhibitor           | GLUT1                                   | 0.927 |
| AMN082                                                                  | Glutamate                       | Agonist             | mGluR7                                  | 0.927 |
| 5-Fluorouracil                                                          | Cell Cycle                      | Inhibitor           | Thymidylate synthetase                  | 0.926 |
| Esomeprazole magnesium dihydrate                                        | Ion Channel                     | Inhibitor           |                                         | 0.926 |
| S(-)-Carbidopa                                                          | Biochemistry                    | Inhibitor           | L-aromatic amino acid decarboxylase     | 0.926 |
| 5-(N,N-hexamethylene)amiloride                                          | Ion Pump                        | Inhibitor           | Na+/H+ Antipporter                      | 0.926 |
| Stevioside                                                              | Ion Channels                    | Transport inhibitor | PAH                                     | 0.926 |
| Lometrexol hydrate                                                      | Apoptosis                       | Inhibitor           | GARFTase                                | 0.926 |
| (S)-3,5-Dihydroxyphenylglycine                                          | Glutamate                       | Agonist             | mGluR1                                  | 0.926 |
| Darglitazone sodium salt                                                | Gene Regulation                 | Agonist             | PPAR/RXR                                | 0.926 |
| BTCP hydrochloride                                                      | Dopamine                        | Blocker             | Reuptake                                | 0.925 |
| Icilin                                                                  | Neurotransmission               | Agonist             | CMR1                                    | 0.925 |
| Agomelatine                                                             | Melatonins                      | Agonist             | MT1/MT2                                 | 0.925 |
| Doxylamine succinate                                                    | Histamine                       | Antagonist          | H1                                      | 0.924 |
| K 185                                                                   | Melatonin                       | Antagonist          |                                         | 0.924 |
| Oxolinic acid                                                           | Antibiotic                      | Inhibitor           | DNA Gyrase                              | 0.923 |
| OBAA                                                                    | Phospholipases                  | Inhibitor           |                                         | 0.923 |
| Adenosine                                                               | Adenosine                       | Agonist             |                                         | 0.923 |
| NO-711 hydrochloride                                                    | GABA                            | Inhibitor           | Uptake                                  | 0.923 |
| N-Bromoacetamide                                                        | Na+ Channel                     | Modulator           |                                         | 0.923 |
| MTEP hydrochloride                                                      | Excitatory Amino Acids          | Antagonist          | mGluR5                                  | 0.922 |
| L-655,708                                                               | Benzodiazepine                  | Ligand              | GABA-A                                  | 0.922 |
| L-alpha-Methyl DOPA                                                     | Biochemistry                    | Inhibitor           | Aromatic amino acid decarboxylase       | 0.922 |
| Iproniazid phosphate                                                    | Neurotransmission               | Inhibitor           | MAO                                     | 0.922 |
| Lidocaine hydrochloride                                                 | Na+ Channel                     | Modulator           |                                         | 0.922 |
| Maprotiline hydrochloride                                               | Adrenoceptor                    | Inhibitor           | Reuptake                                | 0.922 |
| 1-(m-Chlorophenyl)-biguanide hydrochloride                              | Serotonin                       | Agonist             | 5-HT3                                   | 0.922 |
| S(-)-Timolol maleate                                                    | Adrenoceptor                    | Antagonist          | beta                                    | 0.922 |
| Arbidol hydrochloride                                                   | Antiviral                       | Inhibitor           |                                         | 0.922 |
| Loperamide hydrochloride                                                | Opioid                          | Ligand              |                                         | 0.921 |
| GBR-12909 dihydrochloride                                               | Dopamine                        | Inhibitor           | Reuptake                                | 0.921 |
| Praziquantel                                                            | Antibiotic                      |                     | Ca2+ Ionophore                          | 0.921 |
| Benserazide hydrochloride                                               | Biochemistry                    | Inhibitor           | Decarboxylase                           | 0.921 |
| Iodoacetamide                                                           | Biochemistry                    | Inhibitor           |                                         | 0.920 |
| 8-Cyclopentyl-1,3-dimethylxanthine                                      | Adenosine                       | Antagonist          | A1                                      | 0.920 |
| Bay 11-7085                                                             | Cell Cycle                      | Inhibitor           | IkB-alpha                               | 0.920 |
| Ellipticine                                                             | Cell Cycle                      | Inhibitor           | CYP1A1 / Topol                          | 0.920 |
| U-69593                                                                 | Opioid                          | Agonist             | kappa                                   | 0.920 |
| (-)-Naproxen sodium                                                     | Prostaglandin                   | Inhibitor           | COX                                     | 0.919 |
| Palmitoyl-DL-Carnitine chloride                                         | Phosphorylation                 | Modulator           | PKC                                     | 0.919 |
| Imperatorin                                                             | Phosphorylation                 | Modulator           | p38 / ERK                               | 0.919 |
| beta-Lapachone                                                          | Apoptosis                       | Activator           |                                         | 0.919 |
| Dihydrocapsaicin                                                        | Vanilloid                       | Agonist             |                                         | 0.919 |
| Cyclothiazide                                                           | Glutamate                       | Agonist             | AMPA                                    | 0.919 |
| Mephetyl tetrazole                                                      | K+ Channel                      | Blocker             | Kv1.5                                   | 0.918 |
| Minoxidil                                                               | K+ Channel                      | Activator           | ATP sensitive                           | 0.918 |
| Rosuvastatin calcium                                                    | Cell Signaling and Neuroscience | Inhibitor           | HMG-CoA                                 | 0.918 |
| Aprindine hydrochloride                                                 | K+ Channel                      | Blocker             | HERG                                    | 0.918 |
| TNP                                                                     | Ion Channels                    | Inhibitor           | IP3K                                    | 0.918 |
| Pilocarpine nitrate                                                     | Cholinergic                     | Agonist             | Muscarinic                              | 0.917 |
| Rizatriptan benzoate salt                                               | Neurotransmission               | Agonist             | 5HT-1B/1D                               | 0.917 |
| SCH 58261                                                               | Purinoceptor                    | Antagonist          | alpha2A                                 | 0.917 |
| Debrisoquin sulfate                                                     | Neurotransmission               | Antihypertensive    |                                         | 0.917 |

|                                                           |                                       |              |                                      |       |
|-----------------------------------------------------------|---------------------------------------|--------------|--------------------------------------|-------|
| Lansoprazole                                              | Ion Pump                              | Inhibitor    | H+ pump                              | 0.917 |
| Famciclovir                                               | Immune Cell Signaling                 | Antiviral    |                                      | 0.917 |
| Meclofenamic acid sodium                                  | Prostaglandin                         | Inhibitor    | COX / 5-Lipoxygenase                 | 0.917 |
| Tazarotene                                                | Cell Biology                          | Inducer      | TIG3                                 | 0.916 |
| Reserpine                                                 | Serotonin                             | Inhibitor    | Uptake                               | 0.916 |
| Flupirtine maleate                                        | Glutamate                             | Antagonist   | NMDA                                 | 0.916 |
| CGP-7930                                                  | GABA                                  | Modulator    | GABA-B                               | 0.915 |
| Linopirdine                                               | Cholinergic                           | Releaser     |                                      | 0.915 |
| Butaclamol hydrochloride                                  | Dopamine                              | Antagonist   | D2-D1                                | 0.914 |
| CGP-13501                                                 | GABA                                  | Modulator    | GABA-B                               | 0.914 |
| gamma-Vinyl GABA                                          | GABA                                  | Inhibitor    | Transaminase                         | 0.914 |
| O-Methylserotonin hydrochloride                           | Serotonin                             | Agonist      |                                      | 0.914 |
| Furosemide                                                | Ion Pump                              | Inhibitor    | Na+,K+,Cl- cotransport               | 0.914 |
| Efaroxan hydrochloride                                    | Imidazoline                           | Antagonist   | I1                                   | 0.914 |
| CGS-21680 hydrochloride                                   | Adenosine                             | Agonist      | A2a                                  | 0.913 |
| R(-)-Me5                                                  | Na+ Channel                           | Antagonist   |                                      | 0.913 |
| Dilazep hydrochloride                                     | Adenosine                             | Inhibitor    | Uptake                               | 0.912 |
| Nefiracetam                                               | Neurotransmission                     | Neotropic    |                                      | 0.912 |
| Tryptamine hydrochloride                                  | Serotonin                             | Ligand       |                                      | 0.912 |
| NF 023                                                    | P2 Receptor                           | Antagonist   | P2X1                                 | 0.912 |
| SKF-89145 hydrobromide                                    | Dopamine                              | Agonist      | D1                                   | 0.911 |
| Allopurinol                                               | Cell Stress                           | Inhibitor    | Xanthine oxidase                     | 0.911 |
| L-Aspartic acid                                           | Glutamate                             | Agonist      |                                      | 0.911 |
| CyPPA                                                     | K+ Channels                           | Modulator    | SK3 and SK2                          | 0.911 |
| Imatinib mesylate                                         | Tyrosine Kinase                       | Inhibitor    | Bcr-Abl                              | 0.911 |
| TBB                                                       | Phosphorylation                       | Inhibitor    | Casein kinase 2                      | 0.911 |
| Nalidixic acid sodium                                     | Antibiotic                            | Inhibitor    | DNA Gyrase                           | 0.911 |
| Capecitabine                                              | Gene Regulation                       |              |                                      | 0.911 |
| Epalrestat                                                | Cell Stress                           | Inhibitor    | Aldose reductase                     | 0.910 |
| Furatylfline                                              | Biochemistry                          | Inhibitor    | P450IA2                              | 0.910 |
| 5-Nitro-2-(3-phenylpropylamino)benzoic acid               | Cl- Channel                           | Blocker      |                                      | 0.910 |
| Gossypol                                                  | Apoptosis                             | Inducer      |                                      | 0.909 |
| (+)-Brompheniramine maleate                               | Histamine                             | Antagonist   | H1                                   | 0.909 |
| Melatonin                                                 | Melatonin                             | Agonist      |                                      | 0.909 |
| m-Iodobenzylguanidine hemisulfate                         | Apoptosis                             | Activator    |                                      | 0.909 |
| Darifenacin hydrobromide                                  | Cholinergics                          | Antagonist   | M3                                   | 0.909 |
| Lonidamine                                                | Cell Stress                           | Inhibitor    | Mitochondrial hexokinase             | 0.908 |
| Metrazoline oxalate                                       | Imidazoline                           | Ligand       |                                      | 0.908 |
| CBIO                                                      | K+ Channel                            | Activator    | CFTR / KCNN4                         | 0.908 |
| Pentylentetrazole                                         | Neurotransmission                     | Modulator    | CNS                                  | 0.908 |
| Loratadine                                                | Histamine                             | Antagonist   | H1                                   | 0.908 |
| SHPP-33                                                   | Cytoskeleton and extracellular matrix | Inhibitor    | microtubules                         | 0.907 |
| Enoximone                                                 | Cyclic Nucleotides                    | Inhibitor    | PDE III                              | 0.907 |
| 1,5-Isoquinolinediol                                      | Apoptosis                             | Inhibitor    | PARS                                 | 0.907 |
| (±)-3-(3,4-dihydroxyphenyl)-2-methyl-DL-alanine           | Neurotransmission                     | Inhibitor    | L-aromatic amino acid decarboxylase  | 0.907 |
| Dequalinium chloride hydrate                              | K+ Channel                            | Blocker      |                                      | 0.907 |
| Lorcainide hydrochloride                                  | Ion Channel Modulator                 | Inhibitor    | Nav1.5                               | 0.907 |
| CR 2249                                                   | Glutamate                             | Agonist      | NMDA-Glycine                         | 0.907 |
| 4-Methylpyrazole hydrochloride                            | Biochemistry                          | Inhibitor    | Alcohol dehydrogenase                | 0.907 |
| S 24795                                                   | Cholinergics                          | Agonist      | a7-nAChR                             | 0.907 |
| O6-benzylguanine                                          | DNA Repair                            | Inhibitor    | O6-alkylguanine-DNA alkyltransferase | 0.906 |
| L-alpha-Methyl-p-tyrosine                                 | Neurotransmission                     | Inhibitor    | Tyrosine hydroxylase                 | 0.905 |
| alpha-Methyl-4-carboxyphenylglycine                       | Glutamate                             | Antagonist   | Metabotropic                         | 0.905 |
| SQ 22536                                                  | Cyclic Nucleotides                    | Inhibitor    | Adenylyl cyclase                     | 0.905 |
| 6-Methyl-2-(phenylethynyl)pyridine hydrochloride          | Glutamate                             | Antagonist   | mGluR5                               | 0.904 |
| WWL113                                                    | Cell Signaling                        | Inhibitor    | Mouse (Ces3)/human CES1              | 0.904 |
| AS605240                                                  | Biochemistry                          | Inhibitor    | P13K                                 | 0.903 |
| Antozoline hydrochloride                                  | Imidazoline                           | Agonist      |                                      | 0.903 |
| BF-170 hydrochloride                                      | Neurodegeneration                     | Binder       | Tau                                  | 0.903 |
| Aminopterin                                               | Antibiotic                            | Inhibitor    | Dihydrofolate reductase              | 0.902 |
| (+)-Pilocarpine hydrochloride                             | Cholinergic                           | Agonist      | Muscarinic                           | 0.902 |
| R(-)-2,10,11-Trihydroxy-N-propylhoraporphine hydrobromide | Dopamine                              | Agonist      | D2                                   | 0.902 |
| DFB                                                       | Glutamate                             | Modulator    | mGluR5                               | 0.901 |
| BW 284c51                                                 | Cholinergic                           | Inhibitor    | Acetylcholinesterase                 | 0.901 |
| 8-Cyclopentyl-1,3-dipropylxanthine                        | Adenosine                             | Antagonist   | A1                                   | 0.900 |
| Moxisylyte hydrochloride                                  | Adrenoceptor                          | Antagonist   | alpha1                               | 0.899 |
| N-Methyl-D-aspartic acid                                  | Glutamate                             | Agonist      | NMDA                                 | 0.899 |
| DL-Buthionine-[S,R]-sulfoximine                           | Multi-Drug Resistance                 | Inhibitor    |                                      | 0.899 |
| Roslin 2                                                  |                                       |              |                                      | 0.899 |
| Fexofenadine hydrochloride                                | Histamine                             | Antagonist   | H1                                   | 0.899 |
| ML396                                                     | Neurotransmitters                     | Modulator    | mGlu group III PAM                   | 0.899 |
| Diclofenac sodium                                         | Prostaglandin                         | Inhibitor    | COX                                  | 0.899 |
| 8-Bromo-cAMP sodium                                       | Cyclic Nucleotides                    | Activator    |                                      | 0.898 |
| (+)-Quisqualic acid                                       | Glutamate                             | Agonist      | AMPA                                 | 0.898 |
| R(-)-N6-(2-Phenylisopropyl)adenosine                      | Adenosine                             | Agonist      | A1                                   | 0.898 |
| Ciprofibrate                                              | Transcription                         | Ligand       | PPAR-alpha                           | 0.898 |
| 3-Nitropropionic acid                                     | Cell Stress                           | Toxin        |                                      | 0.898 |
| NCS-382                                                   | GABA                                  | Antagonist   | gamma-Hydroxybutyrate                | 0.897 |
| Leflunomide                                               | Immune System                         | Inhibitor    |                                      | 0.897 |
| Diethylenetriamipentaacetic acid                          | Biochemistry                          | Inhibitor    | Zn2+-dependent protease              | 0.897 |
| GW9662                                                    | Transcription                         | Inhibitor    | PPAR-gamma                           | 0.896 |
| Cortisone                                                 | Hormone                               |              | Corticosteroid                       | 0.896 |
| BIX                                                       | Cell signaling                        | inducer      | GRP78                                | 0.895 |
| LDN-27219                                                 | Neurobiology                          | Inhibitor    | TG2                                  | 0.895 |
| alpha-Methyl-5-hydroxytryptamine maleate                  | Serotonin                             | Agonist      | 5-HT2                                | 0.895 |
| Piracetam                                                 | Glutamate                             | Modulator    | AMPA                                 | 0.895 |
| Zimelidine dihydrochloride                                | Serotonin                             | Inhibitor    | Reuptake                             | 0.895 |
| Morin                                                     | Cell Stress                           | Inhibitor    | Antioxidant                          | 0.895 |
| L-Cycloserine                                             | Sphingolipid                          | Inhibitor    | Ketosphinganine synthetase           | 0.894 |
| CGP 55845 hydrochloride                                   | GABA                                  | Antagonist   | GABA-B                               | 0.894 |
| Tocainide hydrochloride                                   | Na+ Channel                           | Blocker      |                                      | 0.894 |
| Ketoconazole                                              | Multi-Drug Resistance                 | Inhibitor    | Cytochrome P450c17                   | 0.892 |
| 4-Amino-1,8-naphthalimide                                 | Apoptosis                             | Inhibitor    | FARP                                 | 0.891 |
| L-Glutamine                                               | Glutamate                             | Agonist      |                                      | 0.891 |
| IPA-3                                                     | Phosphorylation                       | Inhibitor    | Pak1                                 | 0.891 |
| Dicyclomine hydrochloride                                 | Cholinergic                           | Antagonist   | Muscarinic                           | 0.891 |
| 3-Morpholinylsodnonimine hydrochloride                    | Nitric Oxide                          | Donor        |                                      | 0.891 |
| R(-)-Apocodine hydrochloride                              | Dopamine                              | Agonist      |                                      | 0.891 |
| 3,4-Dichloroisocoumarin                                   | Biochemistry                          | Inhibitor    | Serine Protease                      | 0.890 |
| Nilutamide                                                | Hormone                               | Inhibitor    | Androgen                             | 0.890 |
| RS504393                                                  | Cytokines                             | Antagonist   | CCR2                                 | 0.889 |
| JW55                                                      | Gene Regulation                       | Inhibitor    | TNKS1/2                              | 0.889 |
| LE 300                                                    | Dopamine                              | Antagonist   | D1                                   | 0.889 |
| Methylergonovine maleate                                  | Dopamine                              | Antagonist   |                                      | 0.889 |
| Nimustine hydrochloride                                   | DNA                                   | Intercalator |                                      | 0.889 |
| S-Nitrosoglutathione                                      | Nitric Oxide                          | Donor        |                                      | 0.889 |
| Amsacrine hydrochloride                                   | DNA Repair                            | Inhibitor    | Topoll                               | 0.888 |
| Anagrelide hydrochloride                                  | Phosphodiesterase inhibitors          | inhibitor    |                                      | 0.888 |
| Formoterol                                                | Adrenoceptor                          | Agonist      | beta2                                | 0.887 |
| FPL 64176                                                 | Ca2+ Channel                          | Activator    | L-type                               | 0.886 |
| Ro 90-7501                                                | Neurodegeneration                     | Inhibitor    | amyloid beta42 fibril formation      | 0.886 |
| AZ191                                                     | Cell Cycle                            | Inhibitor    | DYRK1B                               | 0.886 |
| Papaverine hydrochloride                                  | Cyclic Nucleotides                    | Inhibitor    | PDE                                  | 0.886 |
| WB-4101 hydrochloride                                     | Adrenoceptor                          | Antagonist   | alpha1A                              | 0.885 |
| SB 674042                                                 | Cytokines                             | Antagonist   | OX1R                                 | 0.885 |
| Nitidine chloride                                         | Apoptosis                             | Inducer      |                                      | 0.885 |
| CB 1954                                                   | DNA                                   | Intercalator |                                      | 0.885 |

|                                                                    |                                     |                |                           |       |
|--------------------------------------------------------------------|-------------------------------------|----------------|---------------------------|-------|
| Triamcinolone                                                      | Hormone                             | Agonist        | Glucocorticoid            | 0.884 |
| Kynurenic acid                                                     | Glutamate                           | Antagonist     | NMDA-Glycine              | 0.883 |
| Nimesulide                                                         | Prostaglandin                       | Inhibitor      | COX-2                     | 0.883 |
| Carboplatin                                                        | DNA                                 | Intercalator   |                           | 0.883 |
| BTO-1                                                              | Phosphorylation                     | Inhibitor      | Plk                       | 0.882 |
| DNQX                                                               | Glutamate                           | Antagonist     | Kainate/quisqualate       | 0.882 |
| Sorbinil                                                           | Antioxidants and Cytoprotectants    | Inhibitor      | AR                        | 0.882 |
| GSK1210151A                                                        | Gene Regulation                     | Inhibitor      | BET                       | 0.881 |
| S-(4-Nitrobenzyl)-6-thiinosine                                     | Adenosine                           | Inhibitor      | Uptake                    | 0.881 |
| MDL 28170                                                          | Cell Cycle                          | Inhibitor      | Calpain I / II            | 0.880 |
| p-MPPF dihydrochloride                                             | Serotonin                           | Antagonist     | 5-HT1A                    | 0.880 |
| Ketorolac tris salt                                                | Prostaglandin                       | Inhibitor      | COX                       | 0.879 |
| Naphazoline hydrochloride                                          | Adrenoceptor                        | Agonist        | alpha                     | 0.879 |
| Arcaine sulfate                                                    | Glutamate                           | Antagonist     | NMDA-Polyamine            | 0.879 |
| B-HT 933 dihydrochloride                                           | Adrenoceptor                        | Agonist        | alpha2                    | 0.879 |
| Methoxyverapamil hydrochloride                                     | Ca2+ Channel                        | Antagonist     | L-type                    | 0.878 |
| ET-18-OCH3                                                         | Lipid                               | Inhibitor      | PIPLC                     | 0.878 |
| Diltiazem hydrochloride                                            | Ca2+ Channel                        | Antagonist     | L-type                    | 0.878 |
| Gallamine triethiodide                                             | Cholinergic                         | Antagonist     | M2                        | 0.878 |
| Y-27632 dihydrochloride                                            | Phosphorylation                     | Inhibitor      | ROCK                      | 0.877 |
| T0070907                                                           | Gene Regulation                     | Antagonist     | PPAR gamma                | 0.876 |
| Perifosine                                                         | Phosphorylation                     | Inhibitor      | PKB/Akt                   | 0.874 |
| NS5806                                                             | Ion Channels                        | Modulator      | Kv4.3                     | 0.874 |
| NBI 27914                                                          | Neurotransmission                   | Antagonist     | CRF1                      | 0.874 |
| Phosphomycin disodium                                              | Antibiotic                          |                | Cell wall synthesis       | 0.873 |
| Naloxone hydrochloride                                             | Opioid                              | Antagonist     |                           | 0.872 |
| L-687,384 hydrochloride                                            | Opioid                              | Agonist        | sigma1                    | 0.872 |
| SCH-28080                                                          | Ion Channels                        | Inhibitor      | H+/K+-ATPase              | 0.872 |
| 2,6-Difluoro-4-[2-(phenylsulfonfylamino)ethylthio]phenoxyacetamide | Glutamate                           | Agonist        | AMPA                      | 0.870 |
| Tamoxifen                                                          | Antibiotics/Phosphorylation         | Inhibitor      | Protein Kinase C          | 0.870 |
| L-Glutamic acid hydrochloride                                      | Glutamate                           | Agonist        |                           | 0.870 |
| Supercinnamaldehyde                                                | Ion Channels                        | Activator      | TRPA1                     | 0.870 |
| 2,4-Diamino-6-pyrimidinone                                         | Phosphorylation                     | Inhibitor      | GTP cyclohydrolase I      | 0.870 |
| Etodolac                                                           | Prostaglandin                       | Inhibitor      | COX                       | 0.869 |
| S-Methyl-L-thiocitrulline acetate                                  | Nitric Oxide                        | Inhibitor      | NOS                       | 0.869 |
| Caffeine                                                           | Adenosine                           | Inhibitor      | Phosphodiesterase         | 0.869 |
| Nemadipine-A                                                       | Ca2+ Channels                       | Antagonist     | L-type (alpha1)           | 0.868 |
| L-Methionine sulfoximine                                           | Glutamate                           | Inhibitor      | Glutamine synthase        | 0.868 |
| R(-)-Propylorapomorphine hydrochloride                             | Dopamine                            | Agonist        | D2                        | 0.867 |
| 5-fluoro-5'-deoxyuridine                                           | DNA Metabolism                      | Inhibitor      |                           | 0.867 |
| Rufinamide                                                         | Neurotransmission                   | Anticonvulsant |                           | 0.867 |
| 7-Nitroindazole                                                    | Nitric Oxide                        | Inhibitor      | nNOS                      | 0.867 |
| Bepridil hydrochloride                                             | Ca2+ Channel                        | Blocker        |                           | 0.866 |
| Aurora-A Inhibitor I                                               | kinase phosphatase                  | Inhibitor      | Aurora kinase A           | 0.865 |
| Etoposide                                                          | Apoptosis                           | Inhibitor      | Topo II                   | 0.865 |
| Cyclophosphamide monohydrate                                       | DNA                                 | Intercalator   |                           | 0.864 |
| Moclobemide                                                        | Neurotransmission                   | Inhibitor      | MAO                       | 0.864 |
| Doxazosin mesylate                                                 | Adrenoceptor                        | Blocker        | alpha1                    | 0.863 |
| Levetiracetam                                                      | Neurotransmission                   | Anticonvulsant |                           | 0.863 |
| MRS 2159                                                           | P2 Receptor                         | Antagonist     | P2X1                      | 0.862 |
| Olvamil                                                            | Neurotransmission                   | Agonist        | Vanilloid receptor        | 0.861 |
| PD-407824                                                          | Kinase                              | Inhibitor      | Wee1/Chk1                 | 0.861 |
| 5-Aminovaleric acid hydrochloride                                  | GABA                                | Antagonist     | GABA-B                    | 0.861 |
| AC-93253 iodide                                                    | Hormone                             | Agonist        | RAR(alpha)                | 0.861 |
| SP600125                                                           | Phosphorylation                     | Inhibitor      | c-JNK                     | 0.861 |
| Eupatorin                                                          | Cell Cycle                          | Inhibitor      | CYP1A- family             | 0.860 |
| LY-294,002 hydrochloride                                           | Phosphorylation                     | Inhibitor      | PI3K                      | 0.859 |
| 3,5-Dinitrocatechol                                                | Neurotransmission                   | Inhibitor      | COMT                      | 0.859 |
| Choline bromide                                                    | Cholinergic                         | Substrate      | Choline acetyltransferase | 0.859 |
| (+)-Bromocriptine methanesulfonate                                 | Dopamine                            | Agonist        | D2                        | 0.859 |
| Fluvoxamine maleate                                                | Serotonin                           | Inhibitor      | Reuptake                  | 0.859 |
| Cytidine 5'-diphosphocholine sodium salt hydrate                   | Lipid Signaling                     | Inhibitor      | PLA2                      | 0.859 |
| E-64                                                               | Biochemistry                        | Inhibitor      | Cysteine protease         | 0.858 |
| (±) trans-U-50488 methanesulfonate                                 | Opioid                              | Agonist        | kappa                     | 0.858 |
| DPO-1                                                              | K+ Channel                          | Blocker        | Ikur and Kv1.5            | 0.858 |
| Fusidic acid sodium                                                | Cell Cycle                          | Inhibitor      |                           | 0.858 |
| Betaine hydrochloride                                              | Biochemistry                        | Metabolite     |                           | 0.857 |
| Sivelestat sodium salt hydrate                                     | Biochemistry                        | Inhibitor      | HNE                       | 0.857 |
| S-(+)-PD 123177 trifluoroacetate salt hydrate                      | Neurotransmission                   | Antagonist     | AT2                       | 0.857 |
| Propofol                                                           | Cholinergic                         | Inhibitor      | Muscarinic                | 0.857 |
| 1-[2-(Trifluoromethyl)phenyl]imidazole                             | Nitric Oxide                        | Inhibitor      | NOS                       | 0.856 |
| L-701,324                                                          | Glutamate                           | Antagonist     | NMDA-Glycine              | 0.855 |
| ML 10302                                                           | Serotonin                           | Agonist        | 5-HT4                     | 0.855 |
| NG-Nitro-L-arginine                                                | Nitric Oxide                        | Inhibitor      | NOS                       | 0.855 |
| Glybenclamide                                                      | K+ Channel                          | Blocker        | ATP-dependent             | 0.853 |
| Torin2                                                             | Kinase/Phosphatase                  | Inhibitor      | mTOR                      | 0.853 |
| Neostigmine bromide                                                | Cholinergic                         | Inhibitor      | Acetylcholinesterase      | 0.851 |
| Chlorprothixene hydrochloride                                      | Dopamine                            | Antagonist     | D2                        | 0.849 |
| S-Ethylisothiourea hydrobromide                                    | Nitric Oxide                        | Inhibitor      | NOS                       | 0.849 |
| Nifedipine                                                         | Ca2+ Channel                        | Antagonist     | L-type                    | 0.848 |
| SKF-38393 hydrochloride                                            | Dopamine                            | Antagonist     | D1                        | 0.846 |
| ISRIB                                                              | Serine/Threonine Kinase Inhibitors, | Inhibitor      | eIF2a,PERK                | 0.846 |
| (±)-2,3-Dichloro-alpha-methylbenzylamine hydrochloride             | Neurotransmission                   | Inhibitor      | PNMT                      | 0.845 |
| Bendipine hydrochloride                                            | Ion Channel                         | Blocker        | Calcium                   | 0.841 |
| Talnetant                                                          | Cell Signaling/Neuroscience         | Antagonist     | neurokinin 3              | 0.840 |
| N-Methyl-beta-carboline-3-carboxamide                              | GABA                                | Antagonist     | GABA-A                    | 0.838 |
| Benoxathian hydrochloride                                          | Adrenoceptor                        | Antagonist     | alpha1                    | 0.837 |
| G15                                                                | Bioactive Small Molecules           | Antagonist     | GPR30                     | 0.836 |
| Ganciclovir                                                        | Cell Cycle                          | Inhibitor      | G2-M checkpoint           | 0.836 |
| DAPH                                                               | Phosphorylation                     | Inhibitor      | EGFR                      | 0.836 |
| Hydrocortisone                                                     | Hormone                             |                | Cortisol                  | 0.836 |
| Chlorpropamide                                                     | Hormone                             | Releaser       | Insulin                   | 0.835 |
| N-Ethylmaleimide                                                   | Biochemistry                        | Inhibitor      | Isocitrate dehydrogenase  | 0.831 |
| BIX 01294 trihydrochloride hydrate                                 | Gene Regulation                     | Inhibitor      | HMT                       | 0.829 |
| 1-(4-Chlorobenzyl)-5-methoxy-2-methylindole-3-acetic acid          | Multi-Drug Resistance               | Inhibitor      | MRP1                      | 0.829 |
| Famotidine                                                         | Histamine                           | Antagonist     | H2                        | 0.812 |
| Carmustine                                                         | DNA                                 | Intercalator   |                           | 0.807 |
| Beclomethasone                                                     | Hormone                             |                | Glucocorticoid            | 0.805 |
| Bezafibrate                                                        | Transcription                       | Agonist        | PPAR                      | 0.798 |
| MKC-733                                                            | Serotonergic                        | Agonist        | 5-HT3                     | 0.780 |
| Fenspiride hydrochloride                                           | Adrenoceptor                        | Antagonist     | alpha                     | 0.780 |
| BWB70C                                                             | Leukotriene                         | Inhibitor      | 5-lipoxygenase            | 0.773 |
| Betamethasone                                                      | Hormone                             |                | Glucocorticoid            | 0.769 |
| Wiskostatin                                                        | Actin                               | Inhibitor      | N-WASP                    | 0.769 |
| Budesonide                                                         | Hormone                             |                | Cortisol                  | 0.724 |
| Wortmannin from Penicillium funiculosum                            | Phosphorylation                     | Inhibitor      | PI3K                      | 0.724 |
| GW2974                                                             | Phosphorylation                     | Inhibitor      | EGFR / ErbB-2             | 0.647 |
| ML240                                                              | Cell Signaling and Neuroscience     | Inhibitor      | AAA ATPase p97            | 0.608 |
| PD 169316                                                          | Phosphorylation                     | Inhibitor      | p38 MAP kinase            | 0.581 |
| Tyrphostin AG 1478                                                 | Phosphorylation                     | Inhibitor      | EGFR                      | 0.580 |
| PD153035 hydrochloride                                             | Phosphorylation                     | Inhibitor      | EGFR                      | 0.557 |
| SB 202190                                                          | Phosphorylation                     | Inhibitor      | p38 MAPK                  | 0.403 |
| Brefeldin A from Penicillium brefeldianum                          | Cytoskeleton and ECM                | Inhibitor      | Golgi apparatus           | 0.360 |
